# Supplementary material
Source: PubMed Central journal article supplement (PMC6085671)

## A Catalytic Asymmetric Total Synthesis of (–)-Perophoramidine

Barry M. Trost,\* Maksim Osipov, Sebastian Krüger, and Yong Zhang

*Department of Chemistry, Stanford University, Stanford, CA 94305-5080 (USA)*

### Supporting Information

#### Table of Contents

|      |                                                      |    |
|------|------------------------------------------------------|----|
| I.   | General Remarks .....                                | 2  |
| II.  | Experimental Procedures .....                        | 3  |
| III. | <sup>1</sup> H and <sup>13</sup> C NMR spectra ..... | 18 |

**General Remarks:**

General Remarks: THF was distilled from Na(0)/benzophenone and degassed using the freeze-pump-thaw technique. All other anhydrous solvents were obtained from elution through alumina columns and degassed using the freeze-pump-thaw technique unless stated otherwise. Commercial reagents were used without further purification unless stated otherwise. Reactions were run under nitrogen or argon atmosphere and anhydrous conditions. TLC was performed on precoated glass plates (Merck). Flash chromatography was performed with silica gel 60, 230-400 mesh. <sup>1</sup>H- NMR (0 ppm for tetramethylsilane as internal standard) and <sup>13</sup>C-NMR (77.5 ppm for CDCl<sub>3</sub> as internal standard) spectra were recorded on Varian UI- 600 (600 MHz), UI-500 (500 MHz), Varian MERC-400 (400 MHz), or Varian UI-300 (300 MHz). IR spectra (cm<sup>-1</sup>) were obtained with a Perkin-Elmer FT-IR Paragon 500 spectrometer or a Thermo Scientific Nicolet IR 100 FT- IR spectrometer using neat sample on a NaCl pad. Enantiomeric excess was determined using chiral HPLC analyses on a Thermo Separation Products Spectra Series P-100 or 200 and UV100 (254 nm) using Chiralcell columns (OD-H, OB-H, AD-H, OJ-H OD, OB, OJ, AD, As, OC, IA, IB or IC) eluting with heptane / *iso*-propanol mixtures indicated. Optical rotations were measured on a Jasco DIP-1000 digital polarimeter using 5 cm cells and the sodium D line (589 nm) at ambient temperature in the solvent and concentration indicated.

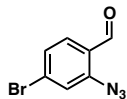

### 2-azido-4-bromobenzaldehyde (**11**)

Sodium azide (7.80 g, 120.0 mmol, 1.20 eq.) was added to a solution of 4-bromo-2-fluorobenzaldehyde (20.3 g, 100 mmol, 1.00 eq.) in DMSO (100 mL, 1.0M). The reaction mixture was heated to 50 °C for 10 h. The mixture was allowed to cool to rt and was poured onto ice water (300 mL). The resulting white precipitate was collected and dried under vacuum. The Solids were dissolved in Et<sub>2</sub>O (400 mL) and brine (100 mL) was added. The organic layer was collected, dried with anhydrous Mg<sub>2</sub>SO<sub>4</sub>, filtered through a plug of silica, eluting with additional Et<sub>2</sub>O (250 mL), and concentrated *via* rotary evaporation. The product was >95% pure by <sup>1</sup>H NMR analysis and was used without further purification (18.74 g, 83%).

**<sup>1</sup>H-NMR** (400 MHz, CDCl<sub>3</sub>): δ = 10.28 (s, 1H), 7.74 (d, *J* = 8.3, 1H), 7.43 (d, *J* = 1.5, 1H), 7.36 (d, *J* = 8.3, 1H). **<sup>13</sup>C-NMR** (100 MHz, CDCl<sub>3</sub>): δ = 187.80, 144.16, 130.41, 128.69, 125.92, 122.39. **IR** (film): 3087, 2122, 1684, 1585, 1391, 1279, 1196, 866, 810, 704, 432 cm<sup>-1</sup>. **MP**: 89 °C.

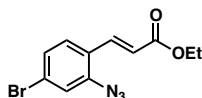

### (*E*)-ethyl 3-(2-azido-4-bromophenyl)acrylate (**12**)

Triethyl phosphonoacetate (14.8 g, 66.0 mmol, 13.0 mL, 1.10 eq.) was added to a flask containing sodium hydride (1.58 g of 60% NaH dispersion in mineral oil, 66.0 mmol, 1.00 eq.) in THF (200 mL), at 0 °C. The resulting reaction mixture was stirred for 30 min, was cooled to -78 °C, and 2-azido-4-bromobenzaldehyde (**11**) (13.56 g, 60.0 mmol, 1.00 eq.) in THF (150 mL, added at 0 °C, cooled in an ice bath) was added dropwise. The reaction mixture was stirred for 3 h at -78 °C, and was diluted with aqueous NH<sub>4</sub>Cl with warming to rt. The phases were separated, and aqueous layer was then extracted three times with EtOAc. The combined organic layers were washed with brine and dried over MgSO<sub>4</sub>. The solvent was removed *in vacuo*. The crude product was used directly since no significant impurities were observed in the <sup>1</sup>H NMR. A small portion of the crude was purified for analytical purposes *via* column chromatography (8% EtOAc/Pet. ether).<sup>1</sup>

**<sup>1</sup>H-NMR** (400 MHz, CDCl<sub>3</sub>): δ = 7.69 (d, *J* = 16.1, 1H), 7.31 (d, *J* = 8.55, 1H), 7.17 (m, 2H), 6.36 (d, *J* = 16.1, 1H), 4.20 (q, *J* = 7.1, 2H), 1.28 (t, *J* = 7.1, 3H). **<sup>13</sup>C-NMR** (125 MHz, CDCl<sub>3</sub>): δ = 166.66, 140.38, 137.74, 129.33, 128.35, 125.12, 124.95, 121.95, 120.47, 60.88, 14.55. **IR** (film): 2981, 2110, 1712, 1634, 1585, 1558, 1481, 1315, 1285, 1178, 1093, 1037, 984, 866, 812, 655, 568, 529, 440 cm<sup>-1</sup>. **MP**: 44 °C.

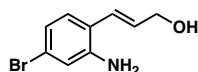

**(E)-3-(2-amino-4-bromophenyl)prop-2-en-1-ol**

To a solution of *E*-ethyl 3-(2-azido-4-bromophenyl)acrylate (**12**) (3.24 g, 11.0 mmol, 1.00 eq.) in THF (60.0 mL, 0.2 M), at -78 °C was added DIBAL-H solution (66.0 mL of a 1.0M solution, 6.00 eq.) dropwise. The reaction was allowed to warm to 0 °C over three hours and TLC indicated complete consumption of the starting material. The reaction was diluted slowly with saturate of sodium potassium tartrate (100 mL) and EtOAc (100 mL). The mixture was stirred overnight, whereupon two layers formed. The two phases were separated, and the aqueous layer was extracted two more times with ethyl acetate. The combined organic layers were dried over MgSO<sub>4</sub>, and the solvent was evaporated *in vacuo* to give the desired product as a white solid 2.47 g (99%).

**<sup>1</sup>H-NMR** (400 MHz, CDCl<sub>3</sub>): δ = 7.10 (d, *J* = 8.2, 1H), 6.85 (m, 2H), 6.58 (d, *J* = 15.7, 1H), 6.23 (dt, *J* = 15.7, 5.5, 1H), 4.33 (d, *J* = 4.8, 2H), 1.55 (brs, 1H). **<sup>13</sup>C-NMR** (100 MHz, CDCl<sub>3</sub>): δ = 145.16, 131.14, 129.06, 125.76, 122.28, 122.13, 122.06, 118.77, 63.99. **IR** (film): 3389, 3202, 2852, 1641, 1587, 1566, 1483, 1414, 1365, 1317, 1257, 1195, 1075, 974, 914, 880, 842, 776, 647, 579 cm<sup>-1</sup>. **MP**: 108 °C.

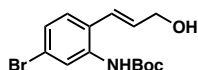

**(E)-tert-butyl (5-bromo-2-(3-hydroxyprop-1-en-1-yl)phenyl)carbamate**

*E*-3-(2-amino-5-bromophenyl)prop-2-en-1-ol (7.71 g, 33.8 mmol, 1.10 eq.), Boc<sub>2</sub>O (9.39 g, 43.0 mmol, 1.40 eq.) and Na<sub>2</sub>CO<sub>3</sub> (3.26 g, 30.7 mmol, 1.00 eq.) were suspended in dioxane/water. The reaction mixture was heated to 70 °C, for 3 h, after which the same amount of both Boc<sub>2</sub>O and Na<sub>2</sub>CO<sub>3</sub> were added. The reaction mixture was stirred for 15 h, followed by the addition of another amount of Boc<sub>2</sub>O and Na<sub>2</sub>CO<sub>3</sub>. The same procedure was repeated after another 5 h. The

reaction mixture was diluted with water (100 mL) and ethyl acetate (100 mL). The layers were separated, and the aqueous phase was extracted with ethyl acetate (2x 100 mL). The combined organic phases were washed with brine, dried with anhydrous  $\text{MgSO}_4$ , and concentrated *via* rotary evaporation. The crude reaction mixture was purified *via* flash chromatography (50% EtOAc:Pet. ether) to provide the desired product as a white solid (1.0 g, 78%, 97% brsm). ( $R_f$ : 0.55 50% EtOAc:Pet. ether).

**$^1\text{H-NMR}$**  (400 MHz,  $\text{CDCl}_3$ ):  $\delta$  = 7.99 (brs, 1H), 7.12 (s, 2H), 6.69 (s, 1H), 6.57 (d,  $J$  = 15.7, 1H), 6.17 (dt,  $J$  = 15.7, 5.1, 1H), 4.28 (m, 2H), 2.77 (brs, 1H), 1.50 (s, 9H).  **$^{13}\text{C-NMR}$**  (100 MHz,  $\text{CDCl}_3$ ):  $\delta$  = 152.96, 136.25, 133.14, 128.18, 127.04, 126.90, 124.43, 124.31, 121.75, 81.28, 63.15, 28.37. **IR** (film): 3309, 2978, 2928, 1700, 1571, 1512, 1458, 1411, 1393, 1367, 1273, 1236, 1157, 1119, 1085, 1052, 1024, 970, 861, 771, 580  $\text{cm}^{-1}$ . **MP** = 104 °C.

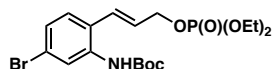

**(*E*)-tert-butyl (5-bromo-2-(3-((diethoxyphosphoryl)oxy)prop-1-en-1-yl)phenyl)carbamate (9)**

To a solution of *E*-tert-butyl (5-bromo-2-(3-hydroxyprop-1-en-1-yl)phenyl) carbamate (10.2 g, 31.0 mmol, 1.00 eq.) in DCM (155 mL, 0.24 M), and pyridine (7.00 mL) at 0 °C was added diethylchlorophosphate (5.88 g, 34.1 mmol, 1.50 eq.). The reaction was stirred at 0 °C for 3 h was diluted with EtOAc (200 mL) and ice cold HCl (200 mL, 0.5M). The layers were separated and the organic layer was washed with ice cold 0.5M HCl (2x 100 mL). The organic layer was dried over  $\text{MgSO}_4$ , and the solvent was removed under reduced pressure. The crude reaction mixture was purified *via* column chromatography (50% EtOAc:PE) to afford the desired product as a pale yellow oil that solidifies upon cooling (10.9 g, 76% yield). ( $R_f$  = 0.31 (50% EtOAc:PE)).  **$^1\text{H-NMR}$**  (400 MHz,  $\text{CDCl}_3$ ):  $\delta$  = 8.07 (brs, 1H), 7.17 (s, 2H), 6.69 (d,  $J$  = 15.6, 1H), 6.60 (brs, 1H), 6.16 (dt,  $J$  = 15.7, 6.0, 1H), 4.69 (m, 2H), 4.13 (q,  $J$  = 7.4, 7.4, 4H), 1.51 (s, 9H), 1.34 (t,  $J$  = 7.1, 6H).  **$^{13}\text{C-NMR}$**  (100 MHz,  $\text{CDCl}_3$ ):  $\delta$  = 152.81, 136.81, 128.54, 128.28, 128.22, 128.07, 126.98, 124.33, 122.69, 81.37, 67.72, 67.67, 64.22, 64.16, 28.49, 16.42, 16.35. **IR** (film),  $\text{cm}^{-1}$ : 3236, 2981, 2933, 1723, 1591, 1572, 1515, 1478, 1411, 1392, 1368, 1269, 1160, 1100, 1029, 972, 872, 854, 799, 773, 511. **MP**: 80 °C.

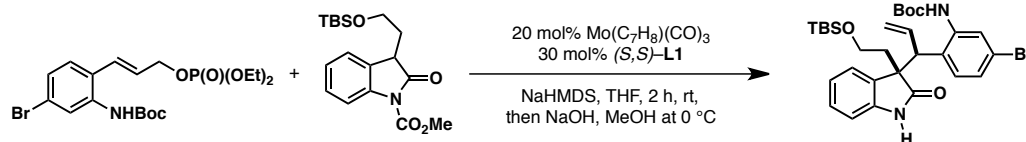

***tert*-butyl (5-bromo-2-((*S*)-1-((*S*)-3-(2-((*tert*-butyldimethylsilyl)oxy)ethyl)-2-oxoindolin-3-yl)allyl)phenyl)carbamate (**8**)**

To a solution of oxindole **10** (4.54 g, 13.0 mmol, 1.0 eq) in THF (40.0 mL) was added a solution of NaHMDS (26.0 mL, 0.5M/THF, 13 mmol) at 0 °C. The solution was allowed to warm to room temperature, and was stirred for 10 minutes. To the deprotonated oxindole solution was added a premixed, deep purple solution of the active catalyst consisting of (Mo(C<sub>7</sub>H<sub>8</sub>)(CO)<sub>3</sub>, 704.9 mg, 2.6 mmol, 20 mol%) and ligand (*S,S*)-**L1**, 1.26 g, 3.9 mmol, 30 mol%) in THF (8.0 mL) that was preheated at 60 °C for 15 min. Upon addition of the catalyst solution, a solution of phosphate **9** (6.10 g, 13.1 mmol, 1.01 eq) was added in THF (32.0 mL) over 20 minutes *via* syringe pump. After 2 h, the red/brown reaction mixture was cooled to 0 °C and NaOH solution (26.0 mL, 1.0 M/MeOH, 26 mmol) was added, and the resulting solution was stirred for 30 minutes. The reaction mixture was diluted with Et<sub>2</sub>O (100 mL), and was filtered thru a 4 cm plug of silica gel eluting with an additional 200 mL of Et<sub>2</sub>O. The resulting solution was concentrated *via* rotary evaporation. The crude reaction mixture was purified *via* flash chromatography (10 % → 15 % EtOAc:Pet. ether.) providing the minor diastereomer (878.2 mg) *R<sub>f</sub>* (minor) = 0.23 (15 % EtOAc:PE) as a white foam followed by the desired product and linear isomer (6.36 g) as a white foam *R<sub>f</sub>* (major) = 0.23 (15 % EtOAc:PE) in 93 % yield for the mixture of regioisomers and diastereomers. The %ee of the major diastereomer was determined *via* chiral HPLC (97%, IA, 98:2 heptane:*i*PrOH, 254 nM, 0.8 mL/min, *t<sub>minor</sub>* = 21.9 min, *t<sub>major</sub>* = 34.1 min).

Major Diastereomer:

**<sup>1</sup>H-NMR** (400 MHz, CDCl<sub>3</sub>): δ = 8.34 (s, 1H), 7.69 (brs, 1H), 7.18 (m, 1H), 7.10 (m, 1H), 7.0 (m, 3H), 6.76 (d, *J* = 7.7, 1H), 6.35 (s, 1H), 6.15 (m, 1H), 5.14 (d, *J* = 16.8, 1H), 5.06 (d, *J* = 10.3, 1H), 3.86 (d, *J* = 9.4, 1H), 3.24 (m, 2H), 2.44 (m, 1H), 1.88 (m, 1H), 1.53 (m, 9H), 0.77 (s, 1H), 0.73 (s, 9H), -0.19 (s, 3H), -0.23 (s, 3H). **<sup>13</sup>C-NMR** (100 MHz, CDCl<sub>3</sub>): δ = 181.17, 153.31, 141.60, 137.03, 135.05, 131.10, 129.41, 128.72, 127.45, 124.75, 123.77, 122.49, 122.00, 121.03, 118.86, 110.10, 81.08, 60.64, 59.48, 55.36, 51.09, 37.80, 28.58, 26.01, 21.28, 18.37, 14.42, -5.58, -5.62. **IR** (film): 3229, 2927, 2855, 1841, 1708, 1650, 1620, 1592, 1573, 1556, 1504, 1470, 1454, 1392, 1367, 1251, 1159, 1109, 1050, 1022, 922, 836, 776, 752 cm<sup>-1</sup>. **MP**: 87 °C. **HRMS**:

(C<sub>30</sub>H<sub>41</sub>BrN<sub>2</sub>NaO<sub>4</sub>Si): calculated (M + Na): 623.1911, found (M + Na): 623.1913.

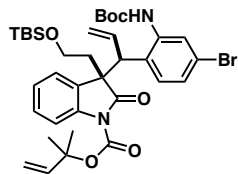

**(S)-2-methylbut-3-en-2-yl 3-((S)-1-(4-bromo-2-((tert-butoxycarbonyl)amino)phenyl) allyl)-3-(2-((tert-butyldimethylsilyl)oxy)ethyl)-2-oxoindoline-1-carboxylate (14)**

To a solution of oxindole (**8**) (3.01 g, 5.0 mmol) in THF (20.0 mL) at 0 °C was added a solution of NaHMDS (6.0 mL, 1M/THF, 6.0 mmol). After 5 min, the reaction mixture was cooled to –78 °C, and a solution of 2-methylbut-3-en-2-yl (4-nitrophenyl) carbonate (**13**) (1.38 g, 5.5 mmol) in THF (5.0 mL) was added dropwise. The reaction mixture was allowed to reach –20 °C at which point TLC indicated the complete consumption of oxindole starting material. A saturated aqueous solution of NaHCO<sub>3</sub> (100 mL) was added to the reaction medium which was allowed to reach rt. The resulting biphasic reaction mixture was diluted with EtOAc (150 mL) and water (100 mL). The organic layer was separated, and the aqueous layer was extracted with EtOAc (3x, 100 mL). The combined organic phases were dried over anhydrous MgSO<sub>4</sub> and the solvent was removed *en vacuo*. The crude reaction mixture was purified *via* column chromatography (10% Et<sub>2</sub>O/pet. ether) to provide the desired product as a white foam (2.60 g, 73%). R<sub>f</sub> = 0.3 (10% Et<sub>2</sub>O/Pet. ether).

**<sup>1</sup>H-NMR** (400 MHz; CDCl<sub>3</sub>): δ 7.75 (d, *J* = 8.1 Hz, 1H), 7.62 (br s, 1H), 7.30-7.25 (m, 1H), 7.17-7.11 (m, 2H), 7.06 (d, *J* = 7.3 Hz, 1H), 6.98 (d, *J* = 8.4 Hz, 1H), 6.22-6.00 (m, 3H), 5.37 (d, *J* = 17.4 Hz, 1H), 5.20-5.12 (m, 3H), 3.77 (d, *J* = 9.6 Hz, 1H), 3.44-3.39 (m, 1H), 3.15 (td, *J* = 10.5, 4.0 Hz, 1H), 2.61-2.54 (m, 1H), 1.84-1.79 (m, 1H), 1.66 (ap d, *J* = 2.9 Hz, 6H), 1.51 (s, 9H), 0.68 (s, 9H), -0.24 (s, 3H), -0.33 (s, 3H). **<sup>13</sup>C NMR** (101 MHz; CDCl<sub>3</sub>): δ 177.1, 153.3, 149.0, 141.9, 140.6, 136.9, 134.5, 130.7, 129.0, 127.82, 127.66, 123.95, 123.80, 121.1, 119.1, 115.6, 114.0, 83.9, 81.0, 59.2, 55.0, 52.4, 37.0, 28.5, 26.8, 26.6, 26.0, 18.3, -5.87, -5.92. **IR** (film): 3387, 2954, 2929, 2857, 1769, 1732, 1508, 1466, 1354, 1295, 1251, 1229, 1159, 1124, 835, 772 cm<sup>-1</sup>. **HRMS**: (C<sub>36</sub>H<sub>49</sub>BrN<sub>2</sub>NaO<sub>6</sub>Si): calculated (M + Na): 735.2441, found (M + Na): 735.2443.

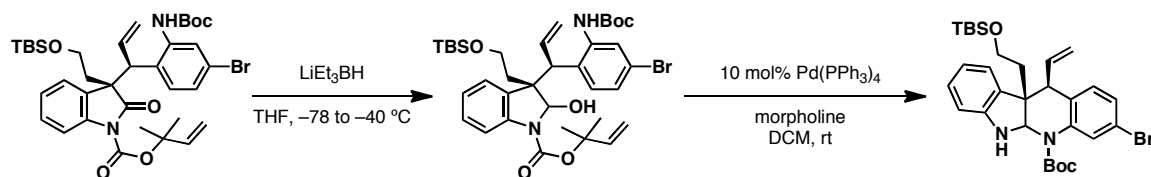

**(10b*S*,11*S*)-*tert*-butyl 3-bromo-10b-(2-((*tert*-butyldimethylsilyl)oxy)ethyl)-11-vinyl-5a,6,10b,11-tetrahydro-5*H*-indolo[2,3-*b*]quinoline-5-carboxylate (7)**

To a solution of carbamate (**14**) (5.00 g, 7.0 mmol) in THF (35 mL) at  $-78^{\circ}\text{C}$  was added a solution of  $\text{LiEt}_3\text{BH}$  (14.0 mL, 1M/THF). The reaction mixture was allowed to reach  $-40^{\circ}\text{C}$  at which point TLC indicated the complete consumption of the carbamate starting material. The reaction mixture was diluted with MeOH (10 mL) and was warmed to rt. EtOAc (200 mL) and water (200 mL) were added and the biphasic mixture was stirred for 15 min. The organic layer was separated, and the aqueous layer was washed with EtOAc (3x 150 mL). The combined organic phases were dried over anhydrous  $\text{MgSO}_4$  and the solvent was removed *in vacuo*. The crude reaction mixture was dissolved in degassed DCM (35 mL), and morpholine (6.10 g, 70 mmol) was added followed by tetrakis(triphenylphosphine)palladium(0) (404.6 mg, 0.35 mmol, 5.0 mol%). The reaction mixture was stirred at rt for 16 h and was filtered through a 4 cm plug of silica washing with  $\text{Et}_2\text{O}$  (300 mL). The crude reaction mixture was concentrated *in vacuo* and was purified *via* column chromatography (10%  $\text{Et}_2\text{O}$ /pet. ether) to provide the desired product as a white foam (3.03 g, 74% over 2 steps)  $R_f = 0.64$  (10% EtOAc/Pet. ether).

**$^1\text{H-NMR}$**  (500 MHz;  $\text{CDCl}_3$ ):  $\delta$  7.42 (s, 1H), 7.02 (dd,  $J = 8.0, 1.9$  Hz, 1H), 6.89 (td,  $J = 7.6, 1.1$  Hz, 1H), 6.83 (dd,  $J = 7.5, 0.7$  Hz, 1H), 6.79 (d,  $J = 8.1$  Hz, 1H), 6.58 (td,  $J = 7.4, 0.6$  Hz, 1H), 6.44 (d,  $J = 7.8$  Hz, 1H), 6.08 (ddd,  $J = 17.0, 10.1, 8.2$  Hz, 1H), 5.68 (s, 1H), 5.18 (dd,  $J = 10.2, 0.5$  Hz, 1H), 5.13 (d,  $J = 17.0$  Hz, 1H), 4.44 (s, 1H), 3.84 (d,  $J = 8.2$  Hz, 1H), 3.66 (ddd,  $J = 10.2, 8.4, 5.2$  Hz, 1H), 3.54-3.49 (m, 1H), 2.13 (ddd,  $J = 13.7, 8.3, 6.7$  Hz, 1H), 2.03 (ddd,  $J = 13.6, 8.2, 5.3$  Hz, 1H), 0.89 (s, 9H), 0.02 (s, 3H), 0.01 (s, 3H).  **$^{13}\text{C-NMR}$**  (126 MHz;  $\text{CDCl}_3$ ):  $\delta$  149.0, 138.2, 135.7, 132.9, 130.7, 129.3, 128.17, 128.06, 127.7, 123.5, 119.6, 118.7, 118.1, 108.6, 82.1, 59.6, 55.1, 50.3, 40.3, 28.6, 26.2, 18.5, -5.12, -5.13. **IR** (film): 3375, 2954, 2930, 1685, 1609, 1594, 1486, 1470, 1392, 1369, 1334, 1255, 1221, 1162, 1099, 1077, 1038, 835, 811, 775, 740  $\text{cm}^{-1}$ .  **$[\alpha]_D^{22}$** :  $-96.8$  ( $\text{CH}_2\text{Cl}_2$ , c 1.06). **HRMS**: ( $\text{C}_{30}\text{H}_{42}\text{BrN}_2\text{O}_3\text{Si}$ ): calculated ( $\text{M} + \text{H}$ ): 585.2148, found ( $\text{M} + \text{H}$ ): 585.2140.

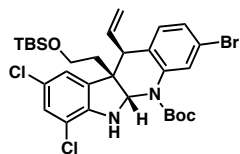

**(10bS,11S)-tert-butyl 3-bromo-10b-(2-((tert-butyldimethylsilyl)oxy)ethyl)-7,9-dichloro-11-vinyl-5a,6,10b,11-tetrahydro-5H-indolo[2,3-b]quinoline-5-carboxylate (15)**

To a solution tetracycle (**7**) (2.64 g, 4.5 mmol) in acetic acid (90 mL) was added  $\text{NaH}_2\text{PO}_4$  (5.40 g, 45.0 mmol) followed by freshly recrystallized *N*-chlorosuccinimide (3.61 g, 27.0 mmol). The reaction mixture was stirred at rt for 16 h at which point saturated  $\text{Na}_2\text{S}_2\text{O}_4$  (80 mL) and EtOAc (150 mL) were added. The biphasic mixture was stirred at rt for 15 min, and the organic layer was separated. The aqueous layer was extracted with ethyl acetate (3x, 150 mL). The combined organic phases were dried over anhydrous  $\text{MgSO}_4$  and the solvent was removed *in vacuo*. The crude reaction mixture was purified *via* column chromatography (5%  $\text{Et}_2\text{O}$ /Pet. ether) to provide the desired product as a white foam (2.59 g, 88%).  $R_f$  = 0.66 (10%  $\text{Et}_2\text{O}$ /Pet. ether).

**$^1\text{H}$ -NMR** (500 MHz;  $\text{CDCl}_3$ ):  $\delta$  7.42 (s, 1H), 7.06 (dd,  $J$  = 8.0, 1.9 Hz, 1H), 6.89 (d,  $J$  = 1.9 Hz, 1H), 6.78 (d,  $J$  = 8.1 Hz, 1H), 6.71 (d,  $J$  = 1.9 Hz, 1H), 5.99 (ddd,  $J$  = 17.0, 10.2, 8.1 Hz, 1H), 5.79 (s, 1H), 5.17 (d,  $J$  = 10.3 Hz, 1H), 5.09 (d,  $J$  = 17.0 Hz, 1H), 4.64 (s, 1H), 3.75 (d,  $J$  = 8.1 Hz, 1H), 3.61-3.57 (m, 1H), 3.50 (dt,  $J$  = 10.5, 6.9 Hz, 1H), 2.10 (dt,  $J$  = 14.1, 7.0 Hz, 1H), 2.03-1.97 (m, 1H), 1.52 (s, 9H), 0.89 (s, 9H), 0.01 (d,  $J$  = 3.5 Hz, 6H).  **$^{13}\text{C}$ -NMR** (126 MHz;  $\text{CDCl}_3$ ):  $\delta$  153.18, 153.17, 144.9, 137.7, 135.0, 133.5, 132.2, 129.2, 128.5, 128.1, 127.5, 123.0, 122.2, 119.9, 118.6, 113.8, 82.4, 77.2, 76.7, 59.4, 56.8, 50.3, 39.7, 28.5, 26.1, 18.4, -5.35, -5.38. **IR** (film): 2954, 2930, 2857, 1692, 1594, 1485, 1471, 1391, 1369, 1332, 1255, 1225, 1161, 1104, 1022, 837, 776, 734  $\text{cm}^{-1}$ .  **$[\alpha]_D^{22}$** : -107.4 ( $\text{CH}_2\text{Cl}_2$ , c 1.06). **HRMS**: ( $\text{C}_{30}\text{H}_{40}\text{BrCl}_2\text{N}_2\text{O}_3\text{Si}$ ): calculated ( $M + H$ ): 653.1363, found ( $M + H$ ): 653.1376.

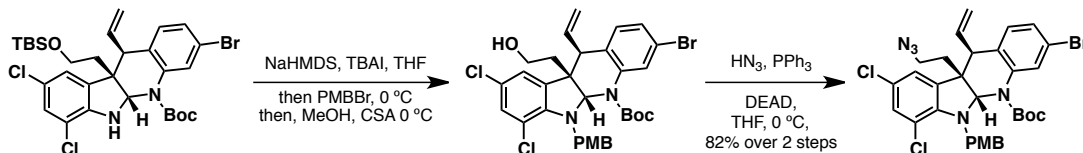

**(5aS,10bS,11S)-tert-butyl 3-bromo-10b-(2-((tert-butyldimethylsilyl)oxy)ethyl)-7,9-dichloro-6-(4-methoxybenzyl)-11-vinyl-5a,6,10b,11-tetrahydro-5H-indolo[2,3-b]quinoline-5-carboxylate (6)**

To a solution of dichloride **15** (2.62g, 4.0 mmol) and TBAI (147.7 mg, 0.40 mmol) in THF (40.0

mL) at 0 °C was added a solution of NaHMDS (8.4 mL, 0.5M/THF, 4.2 mmol). The resulting reaction mixture was stirred for 5 min before PMBBBr (844.5 mg, 4.2 mmol) was added. The resulting reaction mixture became heterogeneous after 5 min and TLC analysis indicated complete consumption of the starting material and a new, more polar spot.  $R_f = 0.5$  (10% EtOAc/Pet Ether). The reaction mixture was diluted with MeOH (20 mL) at 0 °C and CSA (1.86 g, 8.0 mmol) was added. The reaction mixture was stirred at 0 °C for 6 h upon which TLC indicated the formation of a new polar product. The reaction mixture was diluted with saturate  $\text{NaHCO}_3$  solution (200 mL), and the biphasic mixture was stirred with warming to rt. The layers were separated and the aqueous layer was extracted with EtOAc (3x 100 mL). The combined organic extracts were dried over anhydrous  $\text{MgSO}_4$  and the solvent was removed *via* rotary evaporation. The crude product was purified *via* column chromatography (30% EtOAc/Pet. ether) to afford the desired product as a white foam with <5% PMBOH as an impurity. The primary alcohol product was dissolved in THF (40.0 mL) and to this solution was added  $\text{PPh}_3$  (2.10 g, 8.0 mmol) and  $\text{HN}_3$  solution (6.67 mL, 1.2M/PhMe, 8.0 mmol). The reaction mixture was cooled to 0 °C and DEAD (1.39 g, 8.0 mmol, 40% solution in PhMe) was added. The resulting reaction mixture was stirred at 0 °C for 15 min upon which TLC analysis indicated complete consumption of the alcohol starting material. The reaction mixture was concentrated *via* rotary evaporation and the crude reaction mixture was purified *via* column chromatography (5→10%  $\text{Et}_2\text{O}$ , Pet. ether.) to provide the desired product as a white foam. (2.25 g, 82% over 2 steps).  $R_f = 0.3$  (10%  $\text{Et}_2\text{O}$ /Pet. ether).

**$^1\text{H-NMR}$**  (500 MHz;  $\text{CDCl}_3$ ):  $\delta$  7.29-7.25 (m, 2H), 7.12 (dd,  $J = 8.0, 1.4$  Hz, 1H), 6.96 (d,  $J = 2.0$  Hz, 1H), 6.93-6.90 (m, 2H), 6.78-6.76 (m, 2H), 6.00 (s, 1H), 5.77 (ddd,  $J = 16.7, 10.2, 8.8$  Hz, 1H), 5.13 (t,  $J = 9.1$  Hz, 2H), 4.94 (d,  $J = 16.1$  Hz, 1H), 4.81 (d,  $J = 16.1$  Hz, 1H), 3.84 (s, 3H), 3.45 (d,  $J = 8.7$  Hz, 1H), 2.73-2.67 (m, 2H), 2.00 (ddd,  $J = 13.8, 10.0, 5.9$  Hz, 1H), 1.82 (td,  $J = 0.8, 0.4$  Hz, 1H), 1.43 (s, 9H).  **$^{13}\text{C-NMR}$**  (126 MHz,  $\text{CDCl}_3$ ):  $\delta$  159.29, 153.19, 144.19, 137.54, 135.57, 135.02, 133.12, 131.31, 130.73, 130.55, 129.66, 129.06, 122.54, 121.84, 120.07, 118.88, 114.03, 112.69, 82.14, 79.46, 55.53, 54.67, 53.05, 48.91, 47.24, 39.24, 28.42. **IR** (film): 2935, 2892, 2069, 1676, 1491, 1461, 1372, 1350, 1309, 1231, 1148, 724  $\text{cm}^{-1}$ .  **$[\alpha]_D^{22}$** : -126.2 ( $\text{CH}_2\text{Cl}_2$ , c 1.09). **HRMS**: ( $\text{C}_{32}\text{H}_{33}\text{BrCl}_2\text{N}_3\text{O}_3$ ): calculated ( $\text{M} - \text{N}_2 + \text{H}$ ): 656.1082, found ( $\text{M} - \text{N}_2 + \text{H}$ ): 656.1099.

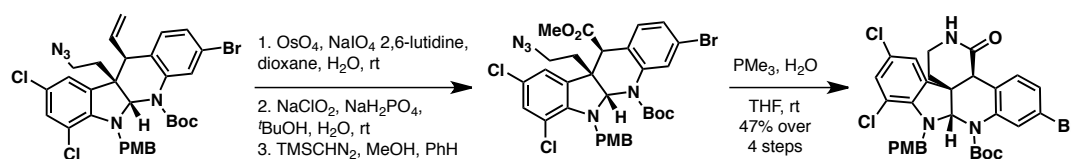

**(4a*S*,9a*S*,14b*S*)-*tert*-butyl 12-bromo-6,8-dichloro-9-(4-methoxybenzyl)-1-oxo-1,3,4,9,9a,14b-hexahydrobenzo[*c*]indolo[3,2-*j*][2,6]naphthyridine-10(2*H*)-carboxylate (5)**

To the tetrazacyclic azide **6** (685 mg, 1.0 mmol) in dioxane (10 mL) was added 2,6-lutidine (214 mg, 2.0 mmol), NaIO<sub>4</sub> (856 mg, 4.0 mmol), water (3.3 mL) and OsO<sub>4</sub> (4% solution in water, 100  $\mu$ L, 1 vol% relative to dioxane). The reaction mixture was stirred for 16 h at rt and TLC analysis indicated disappearance of the starting material and formation of a new polar spot. The reaction mixture was diluted with saturated Na<sub>2</sub>S<sub>2</sub>O<sub>4</sub> solution (15 mL), and EtOAc (50 mL). The biphasic mixture was stirred at rt for 15 min and the layers were separated. The aqueous layer was extracted with EtOAc (3x 50 mL), the combined organic phases were dried over anhydrous MgSO<sub>4</sub> and the solvent was removed *via* rotary evaporation. <sup>1</sup>H NMR analysis of the crude reaction mixture indicated clean formation of the desired aldehyde. The crude aldehyde was dissolved in <sup>t</sup>BuOH (20 mL), and 2-methyl-2-butene (1.40 g, 20 mmol) was added followed by a solution of NaClO<sub>2</sub> (904 mg, 10 mmol) and NaH<sub>2</sub>PO<sub>4</sub> (10.9 g, 7.0 mmol) in water (10 mL). The reaction mixture was stirred at rt for 2 h upon which TLC analysis indicated no remaining aldehyde starting material. The reaction mixture was diluted with saturated Na<sub>2</sub>S<sub>2</sub>O<sub>4</sub> solution (25 mL), and EtOAc (50 mL) and the biphasic mixture was stirred at rt for 15 min. The layers were separated and the aqueous layer was extracted with EtOAc (3x 50 mL). The combined organic phases were dried over anhydrous MgSO<sub>4</sub> and the solvent was removed *via* rotary evaporation. <sup>1</sup>H NMR analysis of the crude reaction mixture indicated formation of the desired carboxylic acid. The crude carboxylic acid was dissolved in PhH (5.0 mL) and MeOH (5.0 mL). TMSCHN<sub>2</sub> solution (2.5 mL, 5.0 mmol, 2M/Et<sub>2</sub>O) was added. Nitrogen evolution occurred, and the reaction mixture became yellow over 10 min. TLC analysis indicated no starting material after 15 min and silica gel was added to the reaction mixture to consume unreacted reagent (2.0 g). The slurry was stirred for 15 min and then filtered washing with EtOAc (100 mL). The filtrate was concentrated and the crude reaction mixture was purified *via* column chromatography (10% Et<sub>2</sub>O/Pet. ether) to afford the desired ester as a white foam. (378 mg ~90% pure.) To the azido ester (378 mg, 0.527 mmol) in THF (5.3 mL) was added water (20  $\mu$ L, 1.1 mmol) followed by a solution of PMe<sub>3</sub> (2.60 mL, 1M/PhMe). The resulting reaction mixture was stirred for 6 h at rt.

TLC analysis indicated complete consumption of the starting material and formation of a new polar spot. The reaction mixture was concentrated *via* rotary evaporation, and the crude material was purified *via* column chromatography (70→80% EtOAc/Pet. ether) to afford the desired product as an off-white foam (313.0 mg, 47% over 4 steps)  $R_f$  = 0.3 (85% EtOAc/Pet. ether).

**$^1\text{H-NMR}$**  (600 MHz;  $\text{CDCl}_3$ ):  $\delta$  7.15 (d,  $J$  = 6.4 Hz, 3H), 6.96 (d,  $J$  = 1.9 Hz, 1H), 6.92 (d,  $J$  = 8.0 Hz, 1H), 6.85 (d,  $J$  = 8.6 Hz, 3H), 6.78 (s, 1H), 6.38 (s, 1H), 6.17 (s, 1H), 4.76 (s, 2H), 3.80 (s, 3H), 3.63 (t,  $J$  = 10.6 Hz, 1H), 3.42 (s, 1H), 3.34-3.32 (m, 1H), 1.63-1.59 (m, 1H), 1.40 (d,  $J$  = 5.7 Hz, 1H), 1.36 (s, 9H).  **$^{13}\text{C-NMR}$**  (126 MHz,  $\text{CDCl}_3$ ):  $\delta$  169.90, 159.18, 152.87, 143.93, 137.46, 137.45, 137.19, 137.18, 131.36, 130.66, 130.59, 130.33, 130.33, 130.17, 129.62, 129.57, 129.03, 123.30, 121.72, 121.02, 114.00, 113.92, 82.21, 78.94, 55.54, 53.10, 50.27, 50.10, 38.39, 33.71, 28.28. **IR** (film): 3202, 2935, 2892, 1675, 1648, 1575, 1491, 1464, 1400, 1370, 1350, 1308, 1230, 1157, 727,  $\text{cm}^{-1}$ .  **$[\alpha]_D^{22}$** : -199.0 ( $\text{CH}_2\text{Cl}_2$ , c 2.67). **HRMS**: ( $\text{C}_{31}\text{H}_{31}\text{BrCl}_2\text{N}_3\text{O}_4$ ): calculated (M + H): 658.0870, found (M + H): 658.0877.

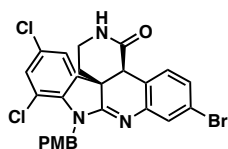

**(4a*S*,14b*S*)-12-bromo-6,8-dichloro-9-(4-methoxybenzyl)-3,4,9,14b-tetrahydrobenzo[*c*]indolo[3,2-*j*][2,6]naphthyridin-1(2*H*)-one (18)**

A vial containing the lactam **5** (248 mg, 0.378 mmol) was heated to 170 °C under high vacuum. After 3 h, the vial was cooled to rt and TLC analysis indicated no remaining starting material. DCM (375  $\mu\text{L}$ ) and HOAc (375  $\mu\text{L}$ ) were added and the reaction mixture was cooled to 0 °C and  $\text{PhI}(\text{OAc})_2$  (145.3 mg, 0.45 mmol) was added. The resulting reaction mixture was stirred for 5 h allowing to warm to rt. The reaction mixture was diluted with saturated  $\text{Na}_2\text{S}_2\text{O}_4$  (20 mL) and EtOAc (50 mL) were added. The biphasic mixture was stirred at rt for 15 min, and the organic layer was separated. The aqueous layer was extracted with ethyl acetate (3x, 50 mL). The combined organic phases were dried over anhydrous  $\text{MgSO}_4$  and the solvent was removed *in vacuo*. The crude reaction mixture was purified *via* column chromatography (35% EtOAc/Pet. ether) to provide the desired product as a yellow foam (136 mg, 65%).

**$^1\text{H-NMR}$**  (600 MHz;  $\text{CDCl}_3$ ):  $\delta$  7.42-7.41 (m, 2H), 7.23-7.18 (m, 5H), 6.83-6.82 (m, 2H), 6.66 (s, 1H), 5.47 (q,  $J$  = 12.8 Hz, 2H), 3.79 (s, 1H), 3.76 (s, 3H), 3.42 (td,  $J$  = 12.4, 5.3 Hz, 1H),

3.38-3.35 (m, 1H), 2.30 (ddd,  $J = 13.5, 12.3, 6.9$  Hz, 1H), 1.34 (dd,  $J = 13.7, 4.6$  Hz, 1H).  **$^{13}\text{C}$ -NMR** (126 MHz,  $\text{CDCl}_3$ ):  $\delta$  169.38, 167.31, 159.05, 145.38, 139.73, 134.53, 131.50, 129.63, 128.85, 128.25, 128.22, 128.03, 127.50, 122.75, 122.66, 119.56, 116.15, 114.27, 55.49, 45.45, 45.04, 43.01, 38.28, 23.75. **IR** (film): 3167, 3028, 2890, 1648, 1626, 1551, 1492, 1475, 1434, 1346, 1326, 1295, 1231, 1188, 1150, 840, 724  $\text{cm}^{-1}$ .  **$[\alpha]_D^{22}$** : +233.2 ( $\text{CH}_2\text{Cl}_2$ , c 0.99). **HRMS**: ( $\text{C}_{26}\text{H}_{21}\text{BrCl}_2\text{N}_3\text{O}_2$ ): calculated (M + H): 556.0189, found (M + Na): 556.0191.

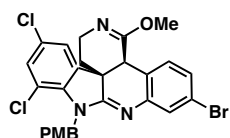

**(4a*S*,14b*S*)-12-bromo-6,8-dichloro-1-methoxy-9-(4-methoxybenzyl)-3,4,9,14b-tetrahydrobenzo[*c*]indolo[3,2-*j*][2,6]naphthyridine (4)**

To a solution of lactam **18** (139 mg, 0.25 mmol) in DCM (2.5 mL) was added  $\text{NaHCO}_3$  solid (420 mg, 5.0 mmol). The reaction mixture was cooled to 0 °C and freshly washed  $\text{Me}_3\text{OBF}_4$  (370 mg, 2.5 mmol) was added.<sup>1</sup> The resulting reaction mixture was stirred overnight at 0 °C upon which TLC analysis indicated the majority of the SM had been consumed. The reaction mixture was diluted with aqueous  $\text{NaHCO}_3$  (20 mL) and EtOAc (50 mL) and the biphasic mixture was stirred with warming to rt. The layers were separated and the aqueous layer was extracted with EtOAc (3x 50 mL). The combined organic extracts were dried over anhydrous  $\text{MgSO}_4$  and the solvent was removed *via* rotary evaporation. The crude product was purified *via* column chromatography (5→10% EtOAc/Pet. ether) to afford the desired product as a white foam (102 mg, 71 %).

**$^1\text{H}$ -NMR** (600 MHz;  $\text{CDCl}_3$ ):  $\delta$  7.37 (d,  $J = 2.0$  Hz, 1H), 7.20-7.18 (m, 4H), 7.15 (dd,  $J = 8.3, 2.1$  Hz, 1H), 6.93 (d,  $J = 2.0$  Hz, 1H), 6.82-6.80 (m, 2H), 5.49-5.43 (m, 2H), 3.94 (s, 3H), 3.75 (s, 3H), 3.68 (dd,  $J = 17.8, 6.5$  Hz, 1H), 3.63 (s, 1H), 3.51 (ddd,  $J = 17.7, 11.6, 6.0$  Hz, 1H), 2.07-2.02 (m, 1H), 1.14 (ddd,  $J = 13.5, 5.4, 1.3$  Hz, 1H).  **$^{13}\text{C}$ -NMR** (126 MHz,  $\text{CDCl}_3$ ):  $\delta$  168.30, 160.94, 159.00, 145.67, 139.60, 135.42, 131.08, 129.82, 128.80, 128.22, 127.71, 127.37, 122.76, 122.28, 122.17, 115.80, 114.23, 55.50, 53.28, 45.35, 42.40, 42.31, 39.84, 24.26. **IR** (film): 2901, 1657, 1625, 1551, 1492, 1432, 1348, 1317, 1304, 1276, 1230, 1184, 1148, 839, 727  $\text{cm}^{-1}$ .  **$[\alpha]_D^{22}$** : +242.8 ( $\text{CH}_2\text{Cl}_2$ , c 1.00). **HRMS**: ( $\text{C}_{27}\text{H}_{23}\text{BrCl}_2\text{N}_3\text{O}_2$ ): calculated (M + H):

<sup>1</sup> Earle, M. J.; Fairhurst, R. A.; Giles, R. G.; Heaney, H. *Synlett*, **1991**, 728.

570.0345, found (M + Na): 570.0336.

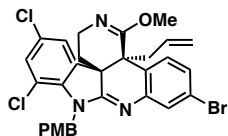

**(4aR,14bS)-14b-allyl-12-bromo-6,8-dichloro-1-methoxy-9-(4-methoxybenzyl)-3,4,9,14b-tetrahydrobenzo[c]indolo[3,2-j][2,6]naphthyridine (3)**

To a solution of imino ether **4** (123 mg, 0.215 mmol) in THF (2.15 mL) at 0 °C was added allyl iodide (72.2 mg, 0.43 mmol) the reaction mixture was wrapped in foil and a solution of KHMDS (850  $\mu$ L, 0.43 mmol, 0.5M/THF) was added dropwise over 10 min. The reaction mixture was stirred for 15 min upon which TLC analysis indicated complete consumption of the starting materials. The reaction mixture was diluted with Et<sub>2</sub>O (5 mL) containing acetic acid (100  $\mu$ L) to consume unreacted base and precipitate inorganic salt. The resulting slurry was filtered through a 2 cm plug of silica eluting with additional Et<sub>2</sub>O (60 mL). The filtrate was concentrated *via* rotary evaporation, and the crude reaction mixture was purified using column chromatography (10 $\rightarrow$ 15% Et<sub>2</sub>O/Pet. ether) to afford the desired product as a foam (129 mg, 98%).

**<sup>1</sup>H-NMR** (500 MHz; CDCl<sub>3</sub>):  $\delta$  7.37 (t,  $J$  = 2.1 Hz, 1H), 7.36-7.34 (m, 2H), 7.32 (d,  $J$  = 8.3 Hz, 1H), 7.24 (d,  $J$  = 2.0 Hz, 1H), 7.17 (dd,  $J$  = 8.3, 2.2 Hz, 1H), 6.93 (d,  $J$  = 2.0 Hz, 1H), 6.89-6.86 (m, 2H), 5.49 (d,  $J$  = 15.7 Hz, 1H), 5.40-5.31 (m, 2H), 4.57-4.55 (m, 1H), 4.32 (d,  $J$  = 16.9 Hz, 1H), 3.92 (s, 3H), 3.80 (s, 3H), 3.66 (dd,  $J$  = 17.8, 6.0 Hz, 1H), 3.55 (ddt,  $J$  = 17.3, 11.4, 5.5 Hz, 1H), 2.67 (dd,  $J$  = 14.3, 5.4 Hz, 1H), 2.30-2.24 (m, 2H), 1.22 (dd,  $J$  = 13.6, 5.1 Hz, 1H).

**<sup>1</sup>H-NMR** (600 MHz; CDCl<sub>3</sub>):  $\delta$  7.34 (d,  $J$  = 2.1 Hz, 1H), 7.32 (d,  $J$  = 8.7 Hz, 2H), 7.28 (d,  $J$  = 8.3 Hz, 1H), 7.21 (d,  $J$  = 2.0 Hz, 1H), 7.14 (dd,  $J$  = 8.3, 2.2 Hz, 1H), 6.90 (d,  $J$  = 2.0 Hz, 1H), 6.85-6.83 (m, 2H), 5.46 (d,  $J$  = 15.8 Hz, 1H), 5.36-5.29 (m, 2H), 4.53 (d,  $J$  = 10.0 Hz, 1H), 4.29 (d,  $J$  = 16.8 Hz, 1H), 3.89 (s, 3H), 3.77 (s, 3H), 3.63 (dd,  $J$  = 17.8, 6.1 Hz, 1H), 3.53 (ddd,  $J$  = 17.6, 11.8, 5.6 Hz, 1H), 2.64 (dd,  $J$  = 14.2, 5.4 Hz, 1H), 2.27-2.21 (m, 2H), 1.19 (dd,  $J$  = 13.6, 5.2 Hz, 1H). **<sup>13</sup>C-NMR** (126 MHz, CDCl<sub>3</sub>):  $\delta$  169.13, 162.03, 159.04, 145.54, 140.15, 133.92, 133.63, 130.89, 130.03, 128.80, 128.73, 128.25, 127.82, 126.95, 126.62, 123.76, 122.21, 118.18, 115.61, 114.10, 55.50, 53.44, 47.45, 46.57, 45.37, 41.93, 39.97, 29.96, 28.08. **IR** (film): 2879, 1647, 1625, 1550, 1492, 1443, 1344, 1328, 1230, 1147, 1020, 839, 724 cm<sup>-1</sup>. **[ $\alpha$ ]<sub>D</sub><sup>22</sup>**: +271.2 (CH<sub>2</sub>Cl<sub>2</sub>, c 2.35). **HRMS**: (C<sub>30</sub>H<sub>27</sub>BrCl<sub>2</sub>N<sub>3</sub>O<sub>2</sub>): calculated (M + H): 610.0658, found (M + H):

610.0660.

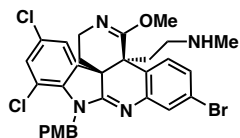

**2-((4aR,14bS)-12-bromo-6,8-dichloro-1-methoxy-9-(4-methoxybenzyl)-3,4,9,14b-tetrahydrobenzo[c]indolo[3,2-j][2,6]naphthyridin-14b-yl)-N-methylethanamine (21)**

To a solution of allyl imino ether **3** (18.3 mg, 0.03 mmol) in DCM (1.0 mL) at 0 °C was added CSA (34.8 mg, 0.15 mmol). The resulting reaction mixture was cooled further to –78 °C and sparged with a stream of ozone until a blue color persisted. At this point, TLC analysis indicated the complete consumption of starting material and MeOH (500  $\mu$ L mL) was added followed by dimethyl sulfide (500  $\mu$ L mL). The resulting reaction mixture was warmed to 0 °C and was stirred for 15 min at which point a saturated aqueous solution of sodium bicarbonate (1.0 mL) was added. The biphasic mixture was stirred for 4 h allowing to warm to rt. The layers were separated and the aqueous layer was extracted with EtOAc (3x 20 mL). The combined organic extracts were dried over anhydrous MgSO<sub>4</sub> and the solvent was removed *via* rotary evaporation. The crude product was dissolved in a EtOH containing MeNH<sub>2</sub> (600  $\mu$ L, 33%/wt solution) and Ti(O<sup>*i*</sup>Pr)<sub>4</sub> (42.6 mg, 0.15 mmol) was added. The resulting solution was stirred at rt for 4 h upon which it was cooled to 0 °C and NaBH<sub>4</sub> (11.3 mg, 0.3 mmol) was added. The resulting reaction mixture was stirred for 10 min and concentrated NH<sub>4</sub>OH (2.0 mL) was added. The slurry was stirred for 10 min at 0 °C and DCM (10 mL) was added. The layers were separated and the aqueous layer was extracted with DCM (3x 10 mL). The combined organic extracts were dried over MgSO<sub>4</sub>, filtered, and the organic solvent was removed *via* rotary evaporation. The crude reaction mixture was purified *via* prep TLC (5% MeOH/DCM) to afford the desired product as a white foam (9.6 mg, 51% over 2 steps).

**<sup>1</sup>H-NMR** (500 MHz; CDCl<sub>3</sub>):  $\delta$  7.37 (dd, *J* = 1.6, 0.8 Hz, 1H), 7.33-7.30 (m, 2H), 7.23 (d, *J* = 2.0 Hz, 1H), 7.17-7.13 (m, 2H), 6.90 (d, *J* = 2.0 Hz, 1H), 6.88-6.85 (m, 2H), 5.54 (d, *J* = 15.8 Hz, 1H), 5.40 (d, *J* = 15.8 Hz, 1H), 3.91 (s, 3H), 3.79 (s, 3H), 3.66 (dd, *J* = 17.7, 6.3 Hz, 1H), 3.54 (ddd, *J* = 17.7, 11.7, 5.8 Hz, 1H), 2.59 (td, *J* = 11.4, 4.0 Hz, 1H), 2.26 (ddd, *J* = 13.6, 11.6, 6.6 Hz, 1H), 2.13 (s, 3H), 1.97 (td, *J* = 11.2, 4.5 Hz, 1H), 1.89 (td, *J* = 12.3, 4.3 Hz, 1H), 1.62-1.56 (m, 1H), 1.23 (dd, *J* = 13.6, 5.2 Hz, 1H). **<sup>13</sup>C-NMR** (126 MHz, CDCl<sub>3</sub>):  $\delta$  168.72, 162.19,

159.06, 145.16, 139.77, 133.39, 131.17, 129.88, 128.77, 128.71, 128.47, 127.71, 127.48, 125.98, 123.63, 122.45, 115.95, 114.16, 55.49, 53.44, 48.50, 48.39, 45.35, 45.22, 41.90, 35.36, 32.24, 27.01. **IR** (film): 2887, 1648, 1623, 1590, 1550, 1492, 1432, 1344, 1230, 1148, 1021, 839, 803, 725 cm<sup>-1</sup>. [ $\alpha$ ]<sub>D</sub><sup>22</sup>: +155.8 (CH<sub>2</sub>Cl<sub>2</sub>, c 1.40). **HRMS**: (C<sub>30</sub>H<sub>30</sub>BrCl<sub>2</sub>N<sub>4</sub>O<sub>2</sub>): calculated (M + H): 627.0924, found (M + H): 627.0926.

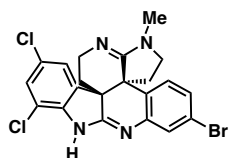

**(3aS,13bR)-6-bromo-10,12-dichloro-1-methyl-1,2,3,9,14,15-hexahydrobenzo[*c*]indolo[3,2-*j*]pyrrolo[3,2-*e*][2,6]naphthyridine perophoramidine (2)**

A solution of methylamine **21** (16.2 mg, 0.26 mmol) was heated to 120 °C in anisole (0.52 mL) for 12 h at which point TLC analysis indicated the complete consumption of starting material. The reaction mixture was cooled to rt, and TFA (104 μL) was added. The resulting reaction mixture was heated to 90 °C for 12 h upon which TLC analysis indicated the complete consumption of starting material. The reaction mixture was cooled to rt, and the volatiles were removed *via* vacuum. The resulting residue was purified *via* prep. TLC (5% MeOH/CHCl<sub>3</sub>) to afford perophoramidine (**2**) as its TFA salt (8.0 mg, 62%, R<sub>f</sub> = 0.35, 5% MeOH/CHCl<sub>3</sub>).

**<sup>1</sup>H-NMR** (600 MHz; CDCl<sub>3</sub>): δ 7.35 (d, *J* = 1.8 Hz, 1H), 7.33 (d, *J* = 1.8 Hz, 1H), 7.19 (dd, *J* = 8.2, 1.9 Hz, 1H), 7.06 (d, *J* = 1.7 Hz, 1H), 6.65 (d, *J* = 8.2 Hz, 1H), 3.77-3.67 (m, 2H), 3.58-3.54 (m, 1H), 3.50 (s, 3H), 3.42 (t, *J* = 9.6 Hz, 1H), 2.36 (ddd, *J* = 14.0, 10.7, 7.9 Hz, 1H), 2.01-1.96 (m, 1H), 1.87 (dd, *J* = 12.5, 5.7 Hz, 1H), 1.64 (dd, *J* = 14.1, 6.1 Hz, 1H). **<sup>13</sup>C-NMR** (126 MHz, CDCl<sub>3</sub>): δ 169.93, 163.07, 146.62, 139.05, 133.01, 130.23, 129.29, 127.95, 126.21, 124.88, 123.81, 122.51, 122.23, 120.65, 50.84, 50.38, 50.36, 50.33, 49.86, 49.83, 49.82, 39.59, 33.75, 30.21, 24.72. **IR** (film): 2882, 1679, 1642, 1611, 1543, 1469, 1390, 1184, 1162, 1114, 896, 722 cm<sup>-1</sup>. The TFA salt could be liberated to the free amidine in by dissolving the material in DCM (3 mL) and stirring with saturated NH<sub>4</sub>OH (3 mL) for 5 min followed by separating of the layers, extraction, drying over anhydrous MgSO<sub>4</sub> and concentration.

**<sup>1</sup>H-NMR** (500 MHz; CDCl<sub>3</sub>): δ 7.28 (d, *J* = 1.9 Hz, 1H), 7.23 (d, *J* = 1.8 Hz, 1H), 7.12 (dd, *J* = 8.2, 1.9 Hz, 1H), 6.97 (d, *J* = 1.9 Hz, 1H), 6.76 (d, *J* = 8.2 Hz, 1H), 3.75-3.61 (m, 2H), 3.28 (td, *J* = 9.7, 5.9 Hz, 1H), 3.14-3.11 (m, 3H), 3.11-3.08 (m, 1H), 2.20 (ddd, *J* = 13.5, 10.2, 7.7 Hz, 1H),

1.80-1.74 (m, 1H), 1.69 (dd,  $J = 12.2, 5.8$  Hz, 1H), 1.37 (dd,  $J = 13.6, 6.2$  Hz, 1H).  **$^{13}\text{C}$ -NMR** (126 MHz,  $\text{CDCl}_3$ ):  $\delta$  172.41, 159.67, 147.82, 138.68, 135.71, 129.09, 128.33, 127.50, 127.05, 125.76, 122.99, 122.62, 121.97, 120.49, 52.35, 46.45, 45.65, 43.00, 31.15, 30.02, 25.23. **IR** (film): 2884, 2816, 1639, 1611, 1541, 1466, 1435, 1390, 1279, 1196, 1160, 1070, 932, 895, 850, 804, 722  $\text{cm}^{-1}$ .  $[\alpha]_{\text{D}}^{22}$ :  $-26.4$  ( $\text{CHCl}_3$ ,  $c$  1.10). **HRMS**: ( $\text{C}_{21}\text{H}_{18}\text{BrCl}_2\text{N}_4$ ): calculated ( $\text{M} + \text{H}$ ): 475.0086, found ( $\text{M} + \text{H}$ ): 475.0078.

---

<sup>1</sup> On smaller scale, the entire reaction mixture was purified *via* column chromatography, and an 86% isolated yield was obtained.

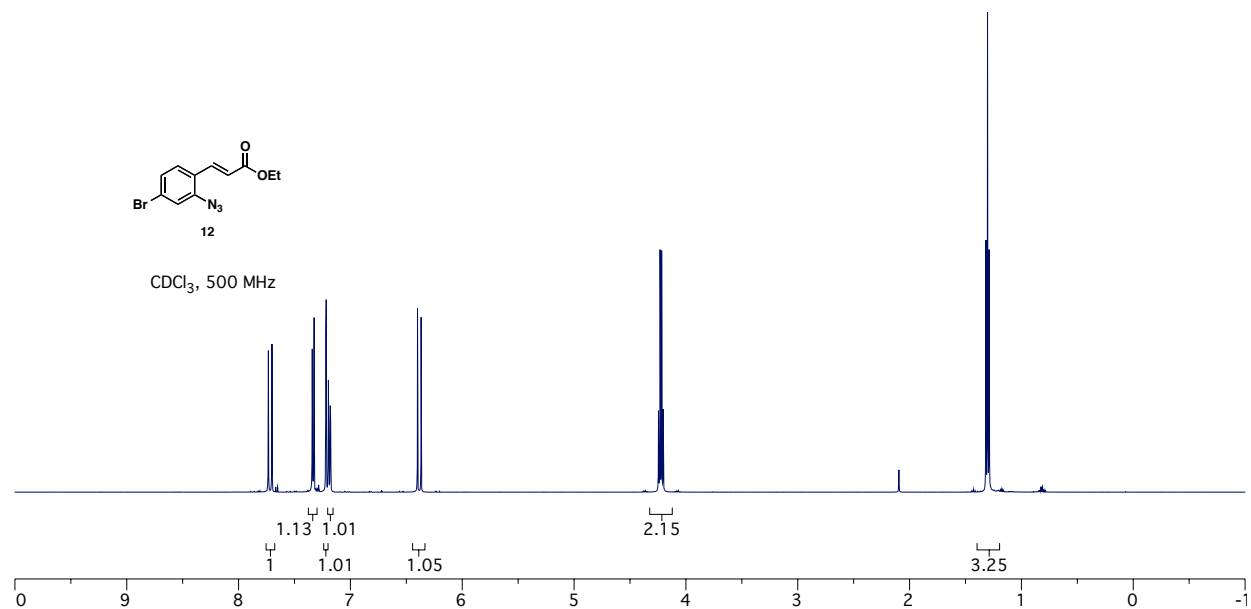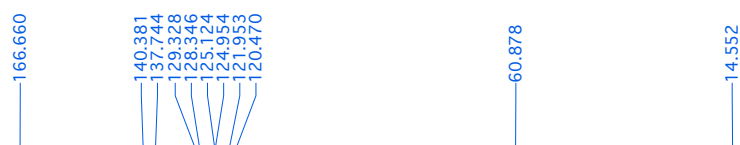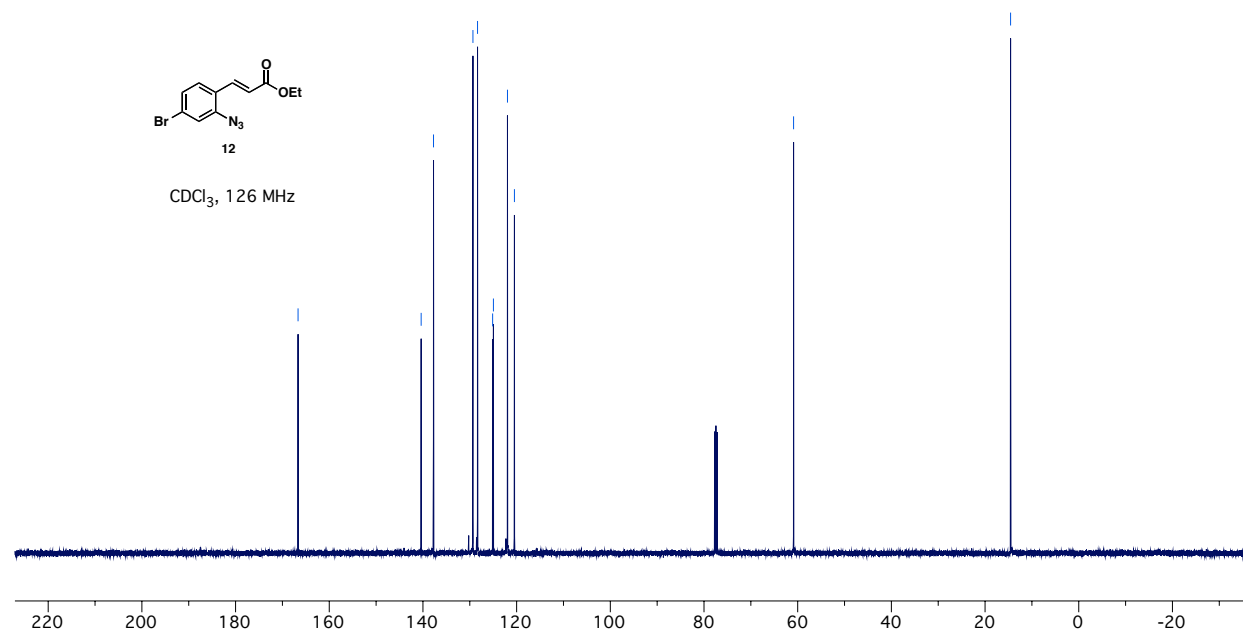

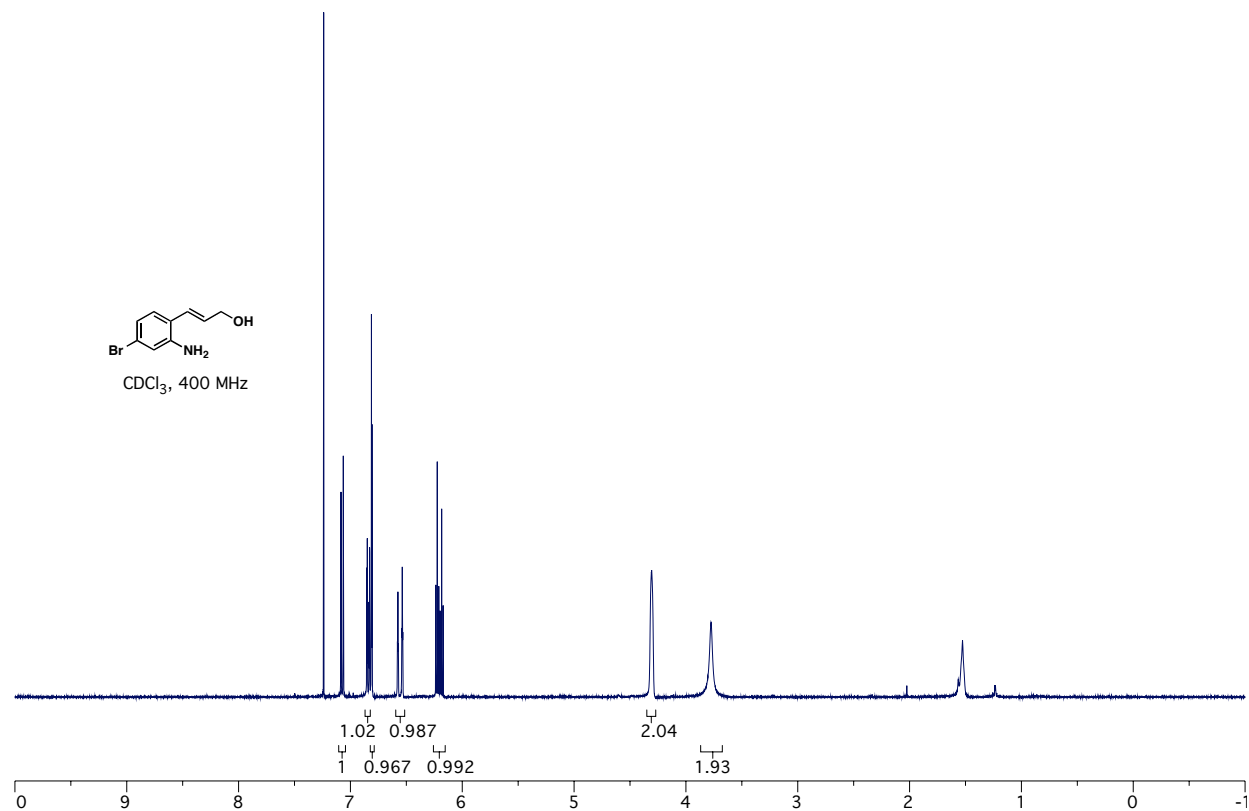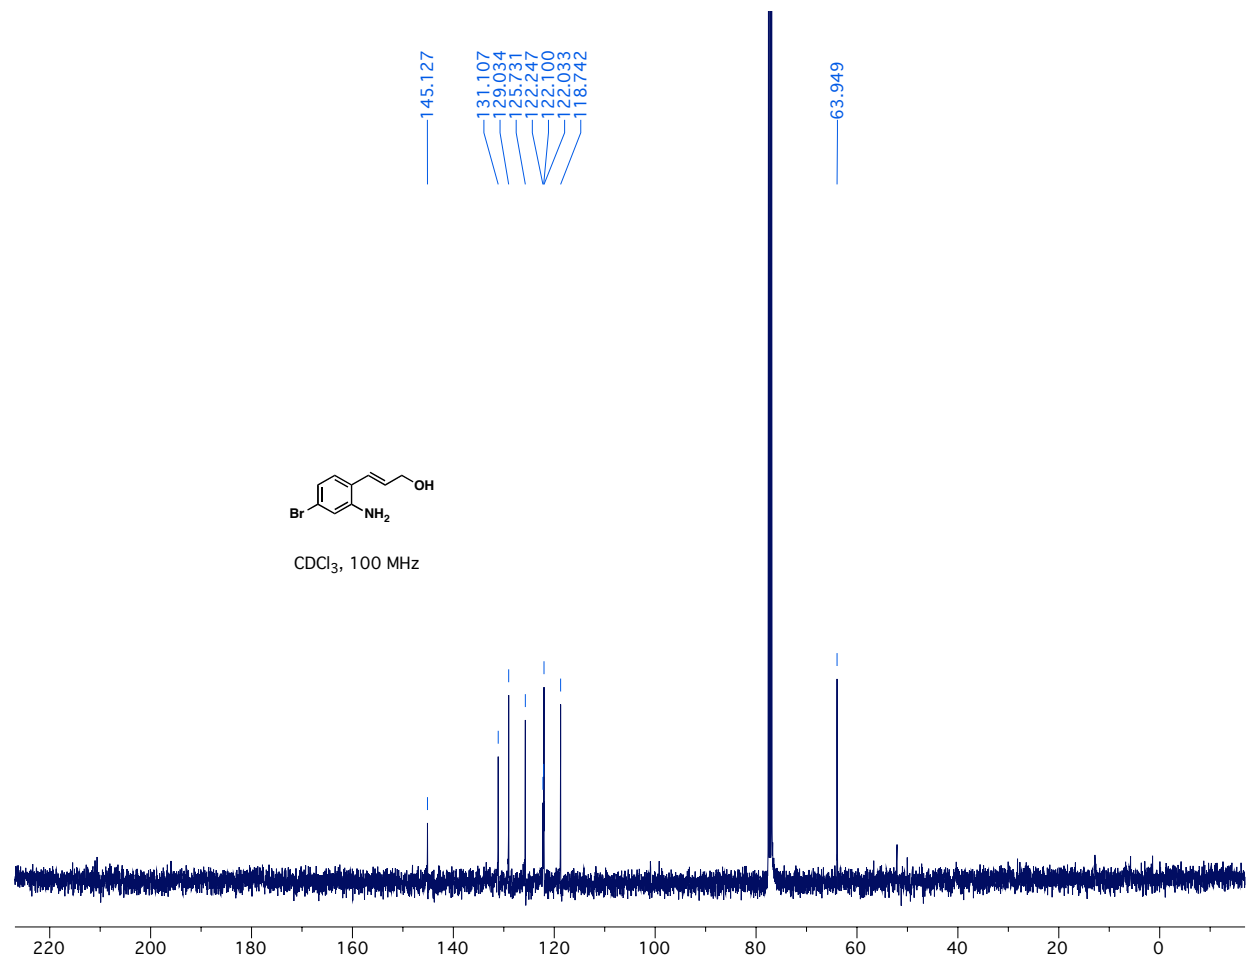

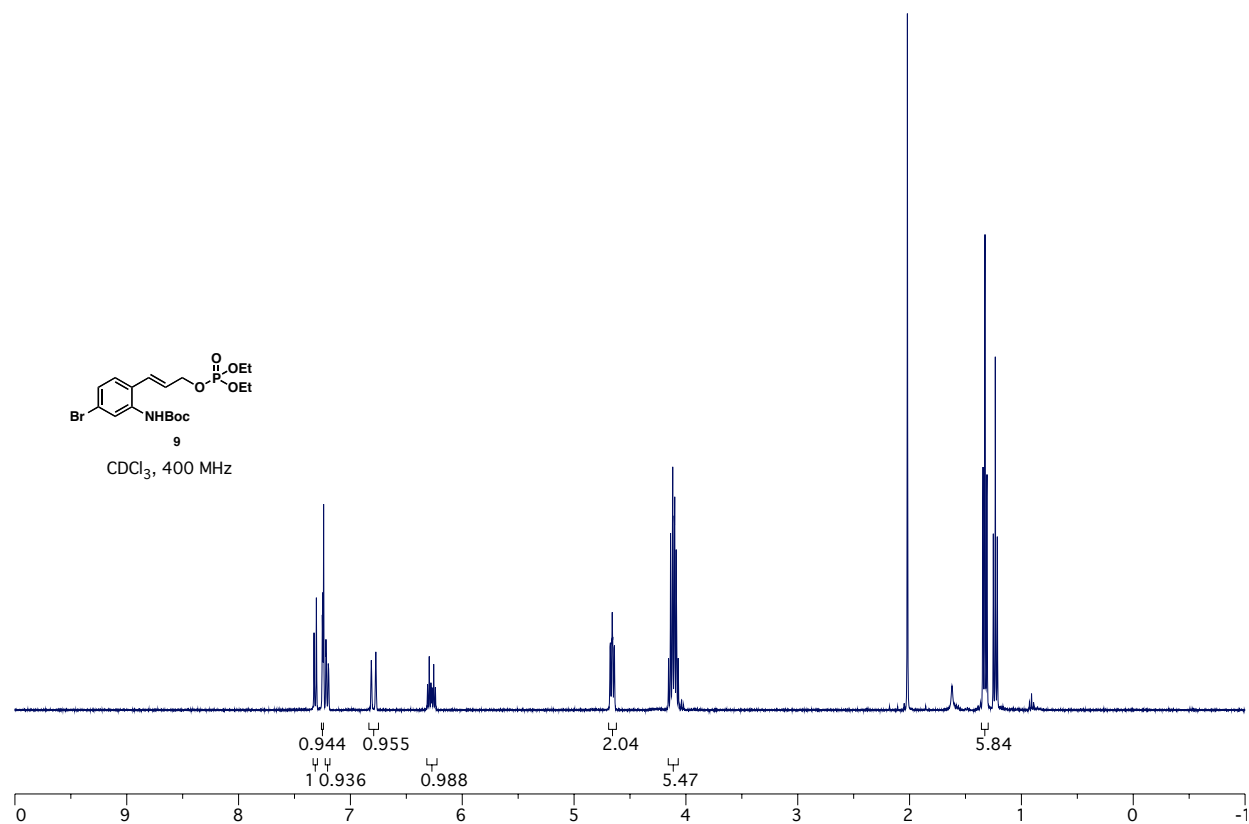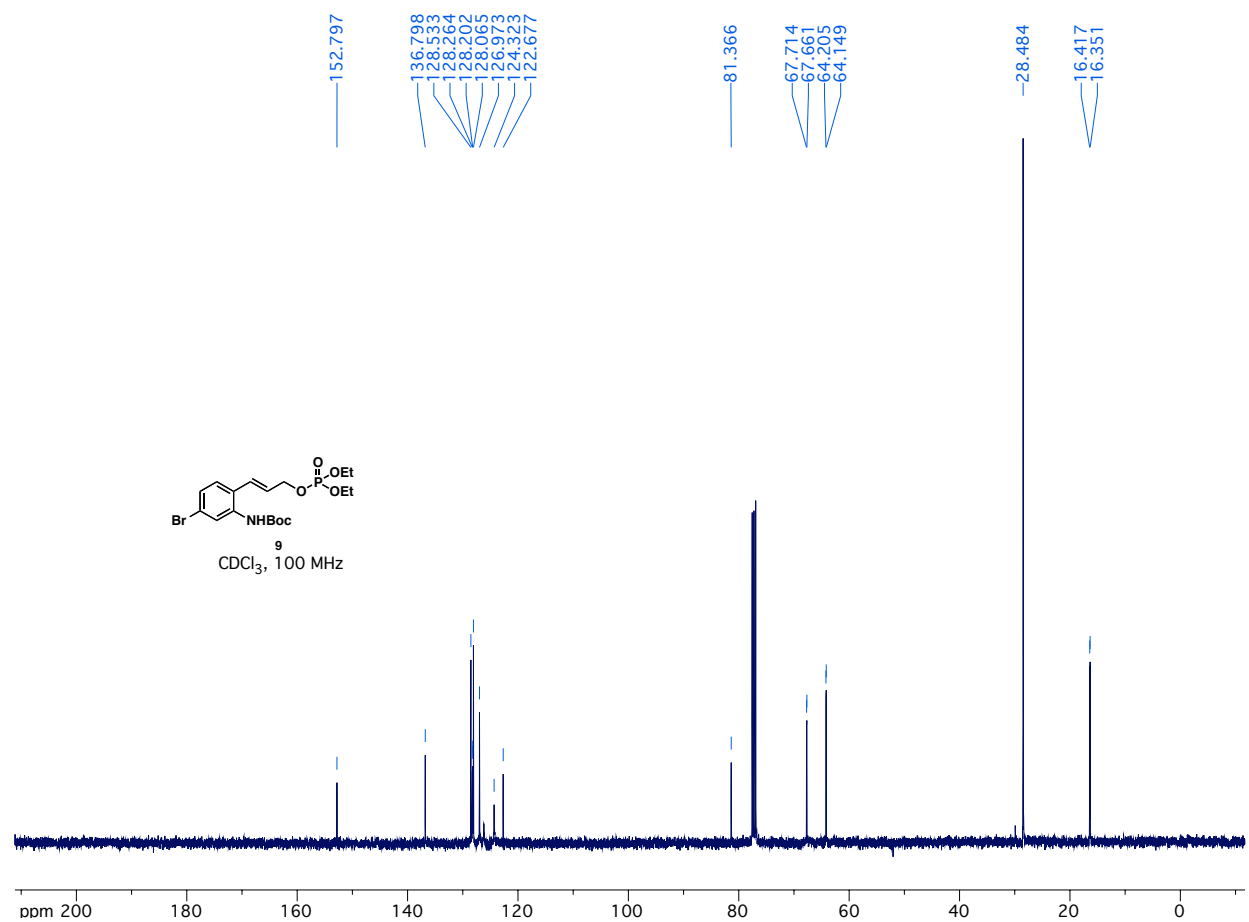





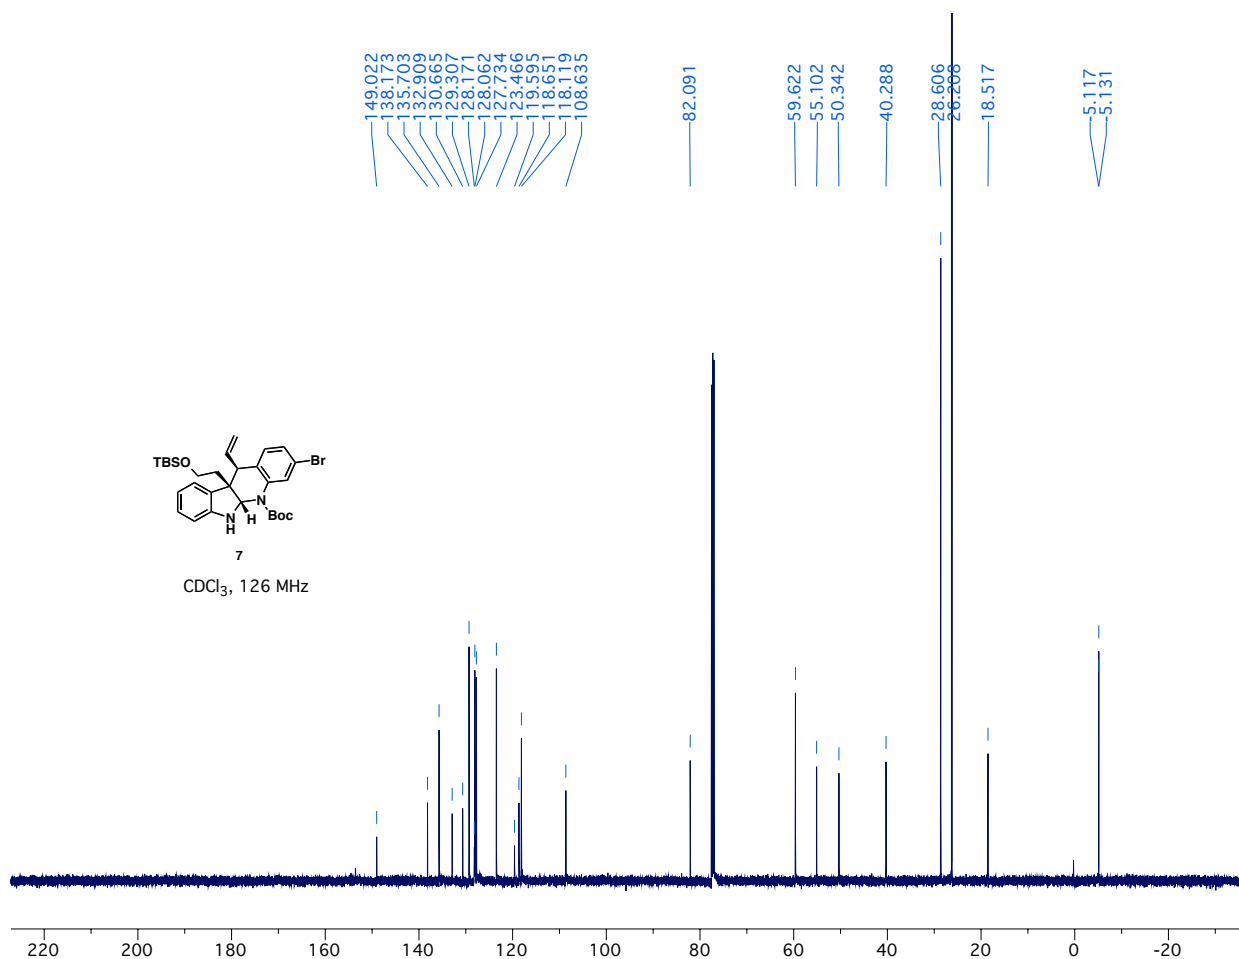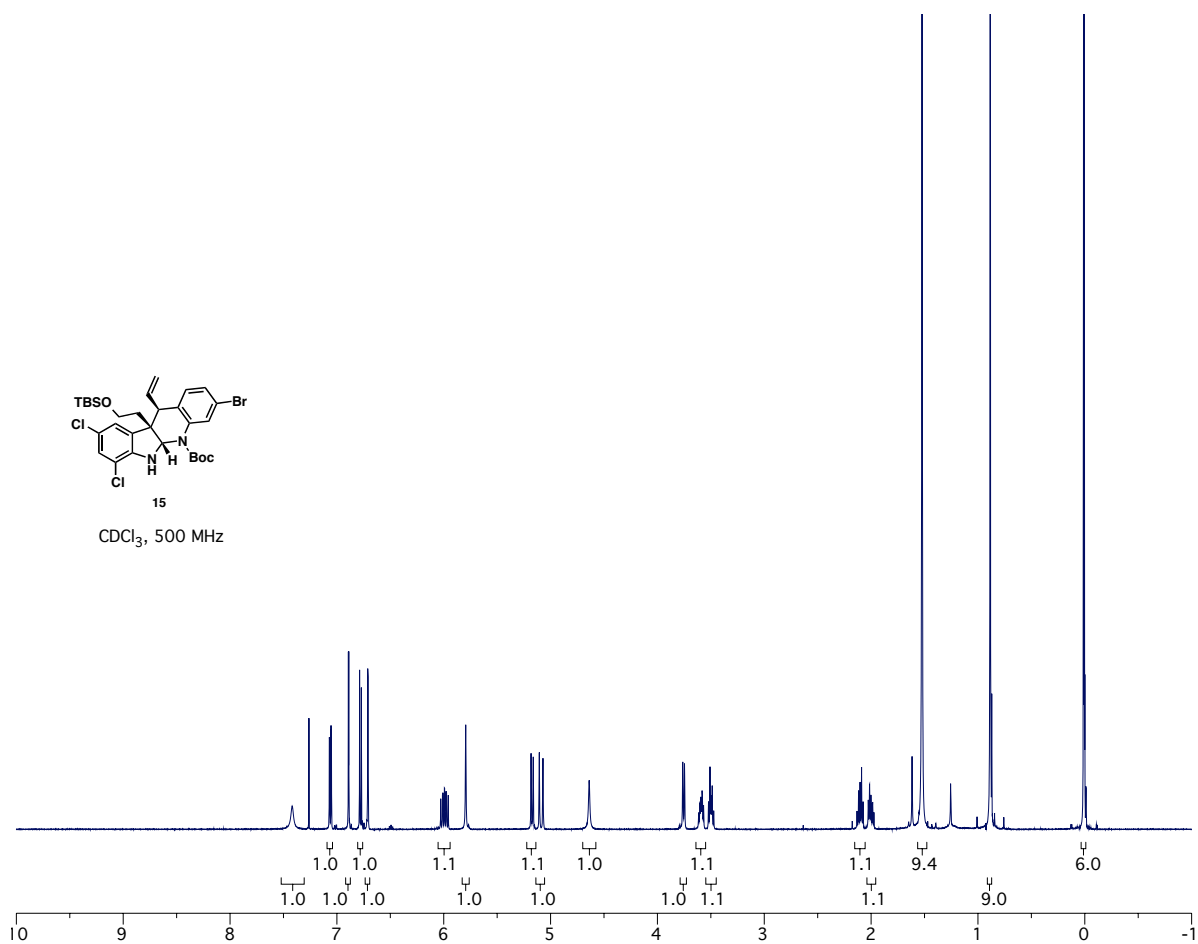

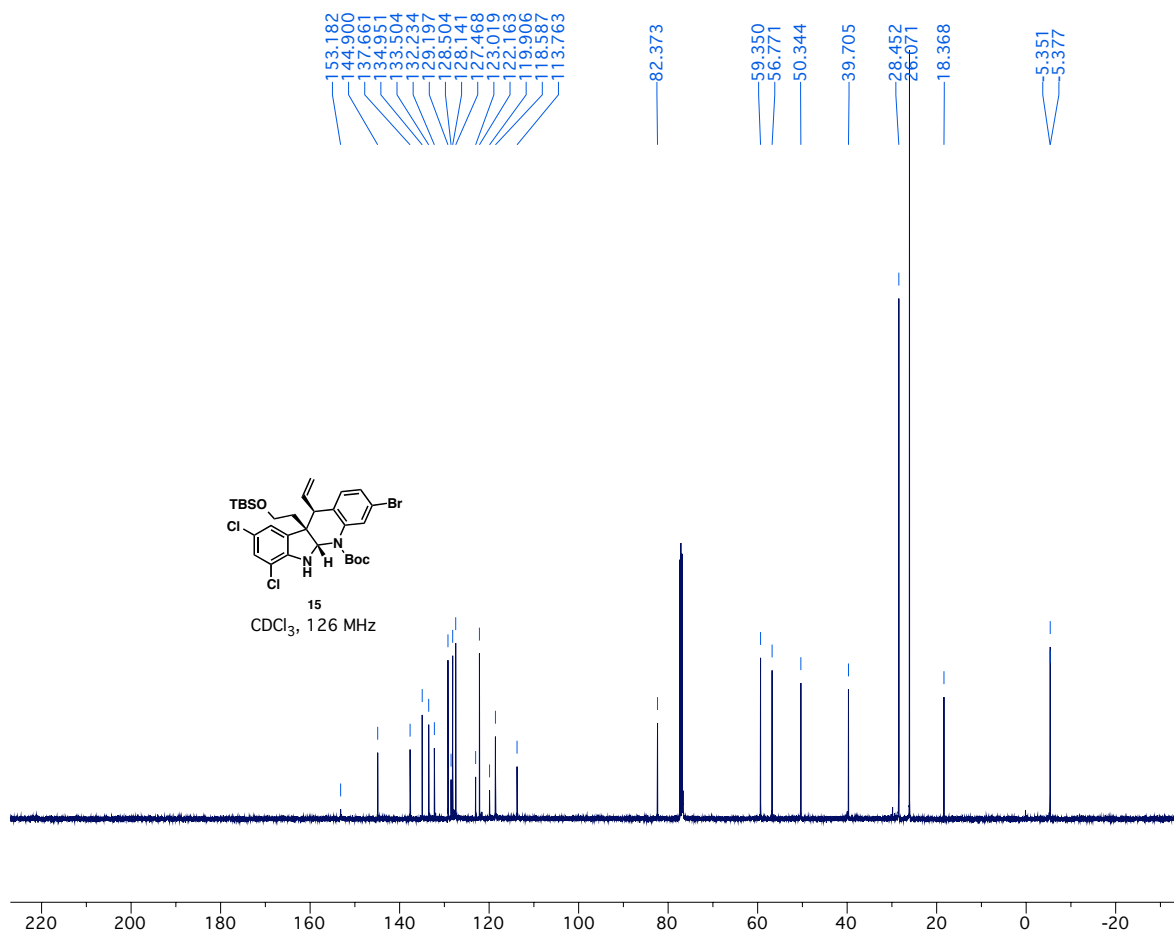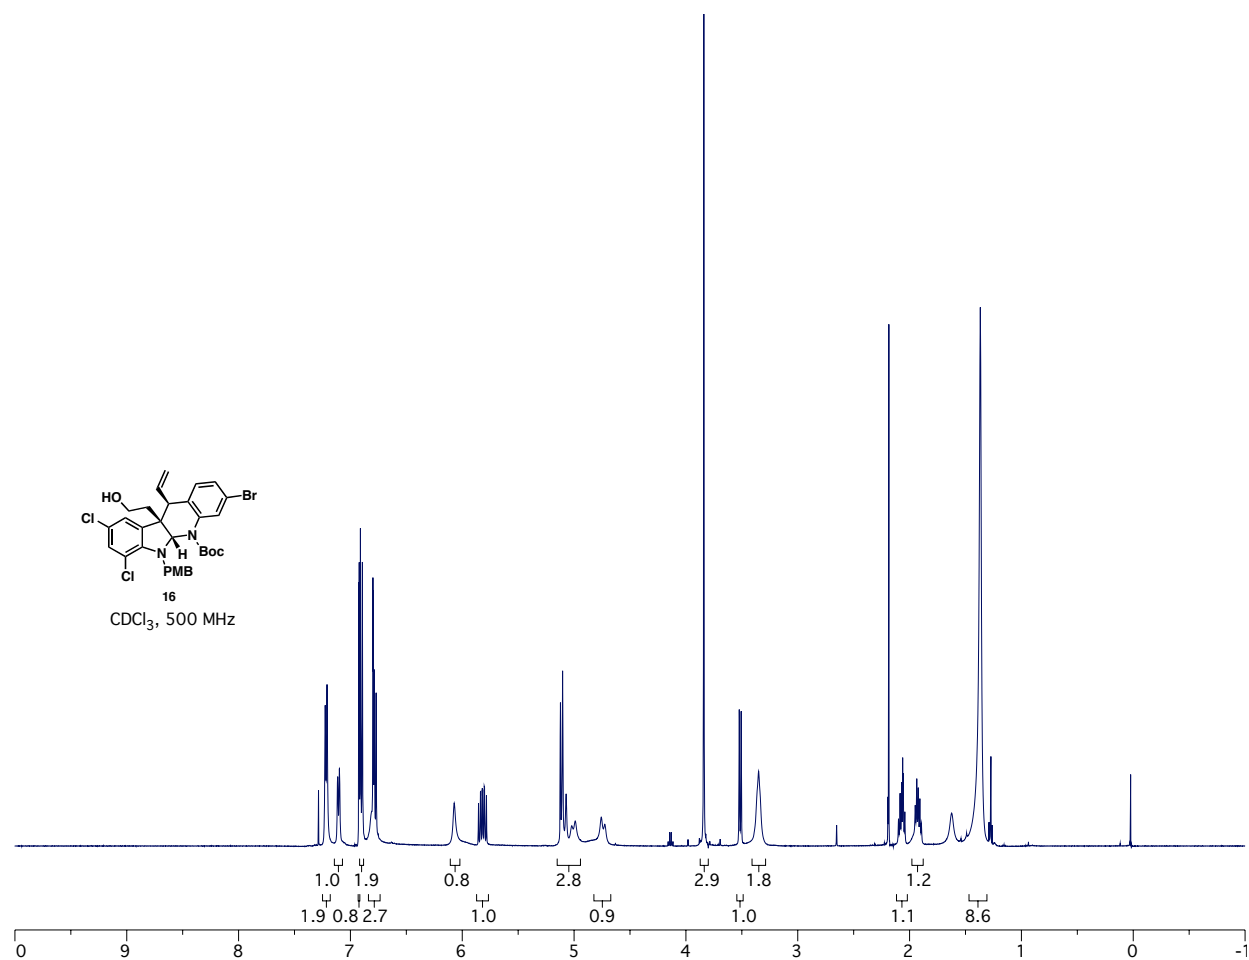

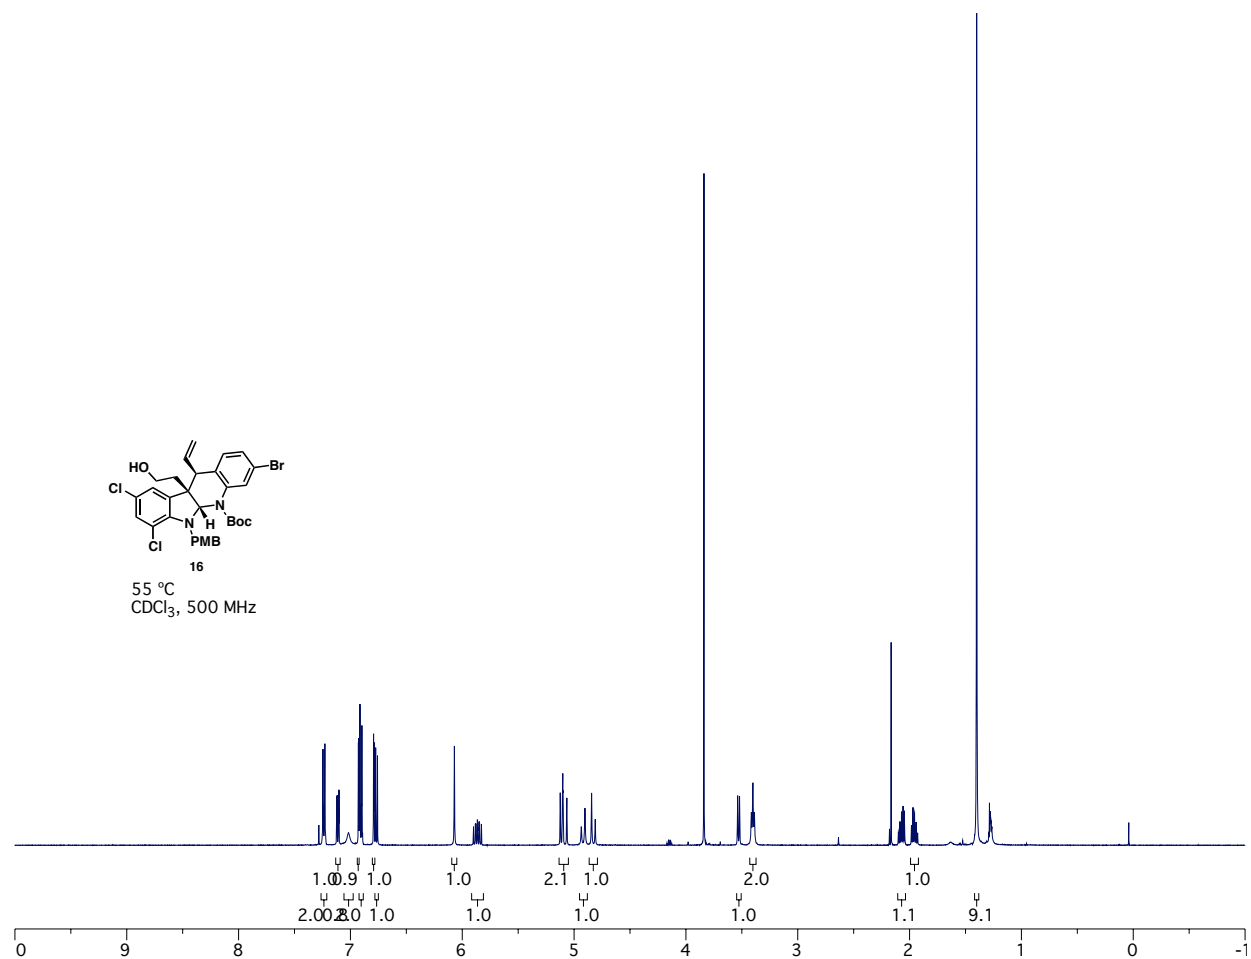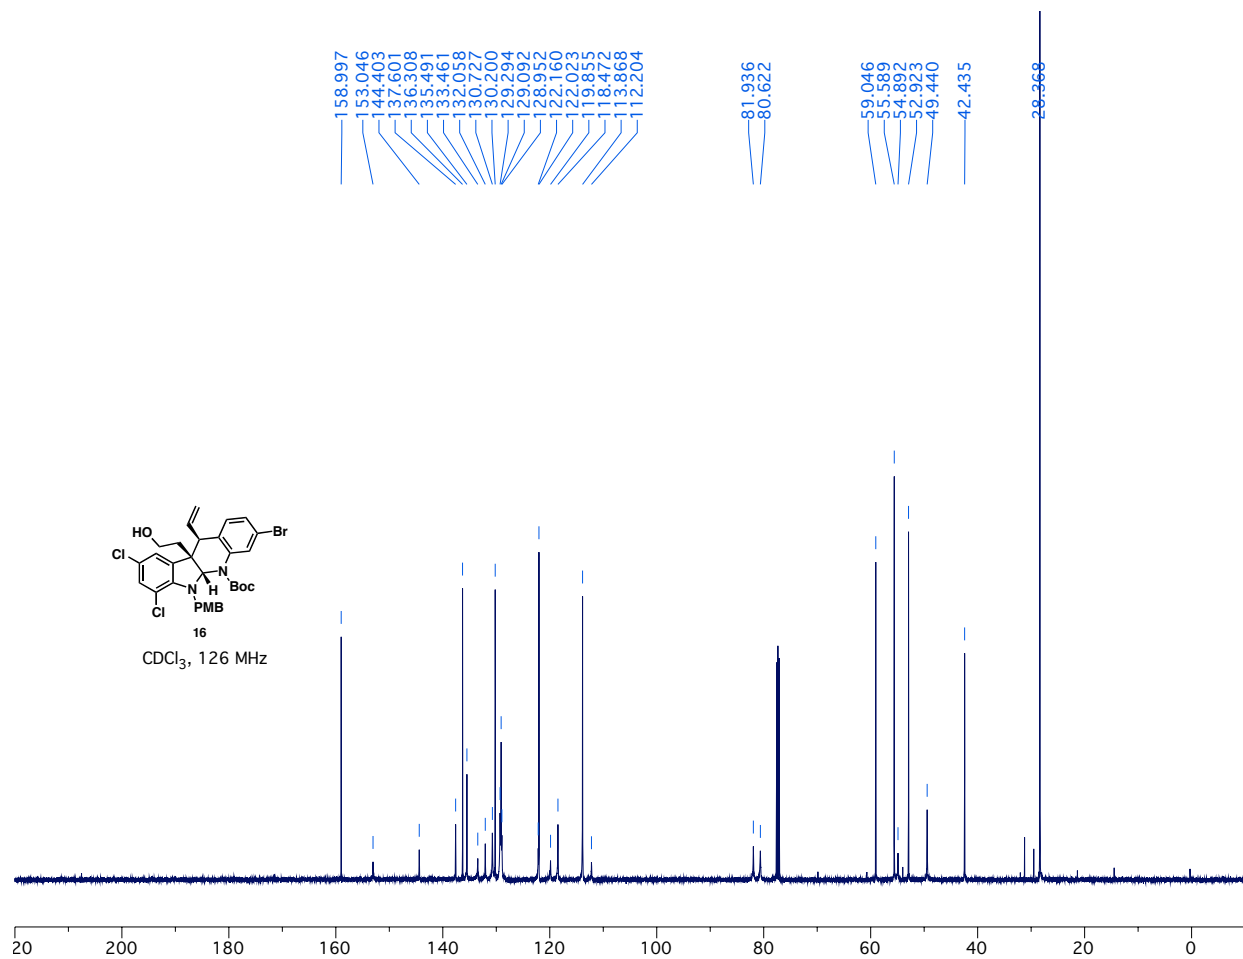

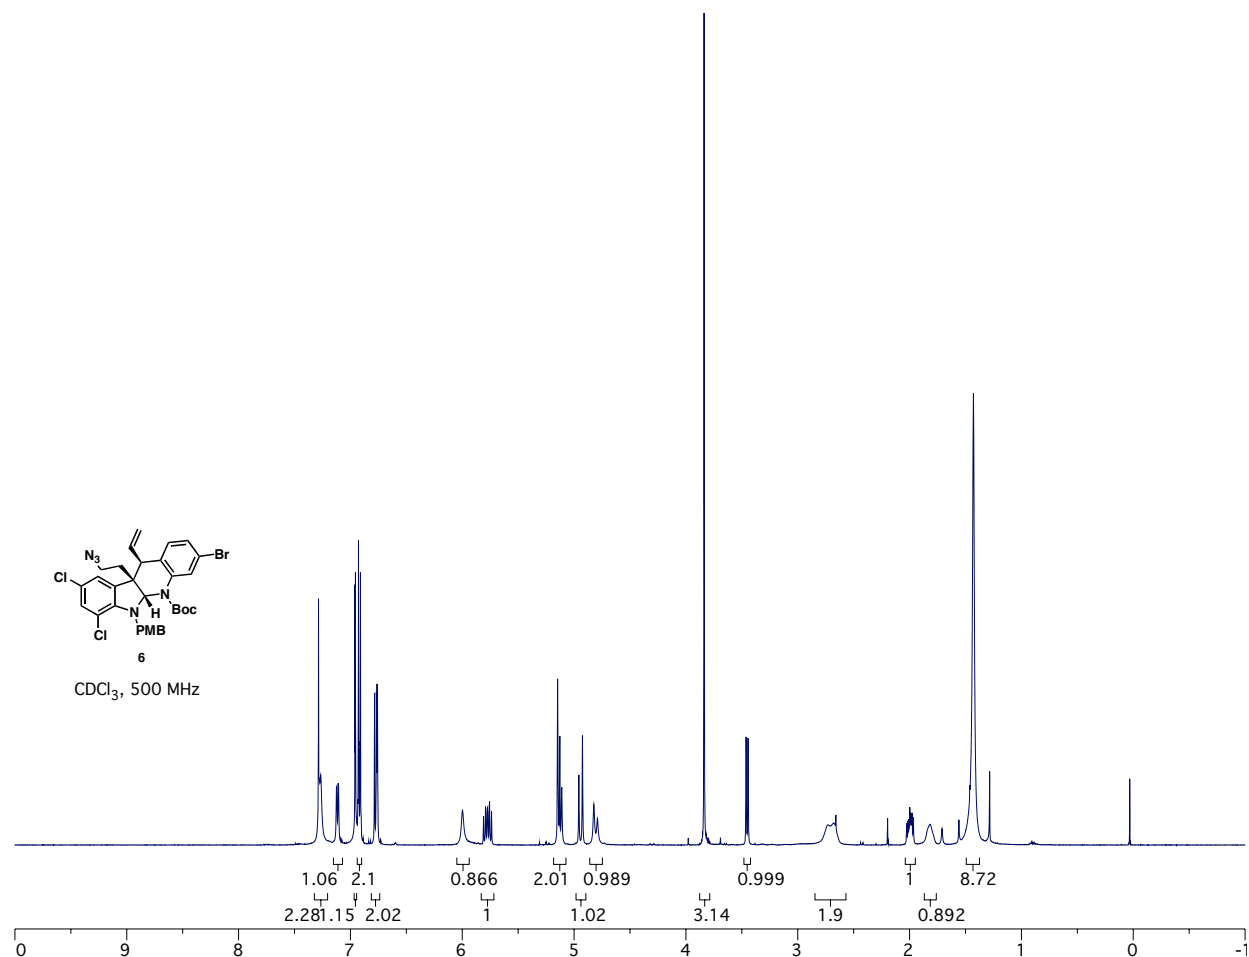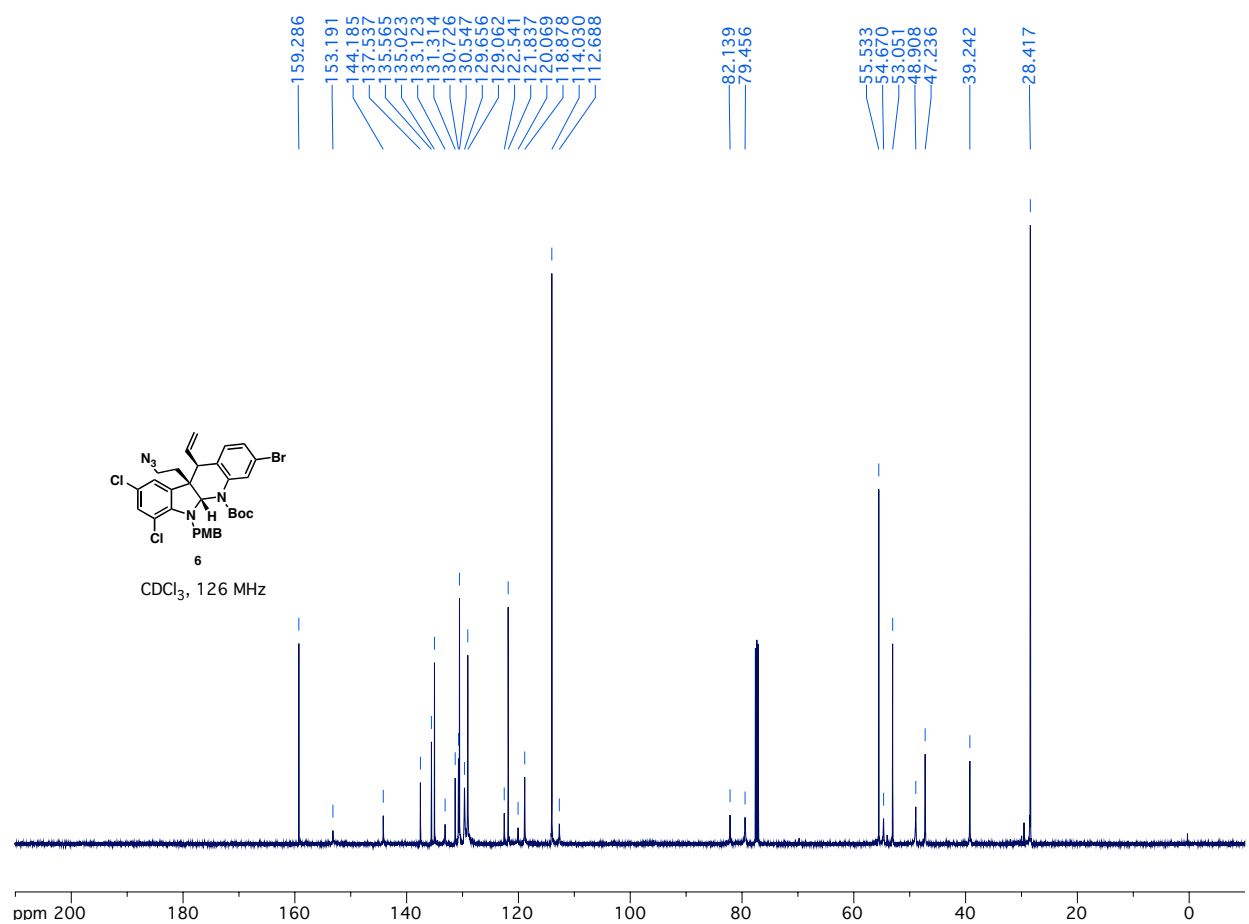

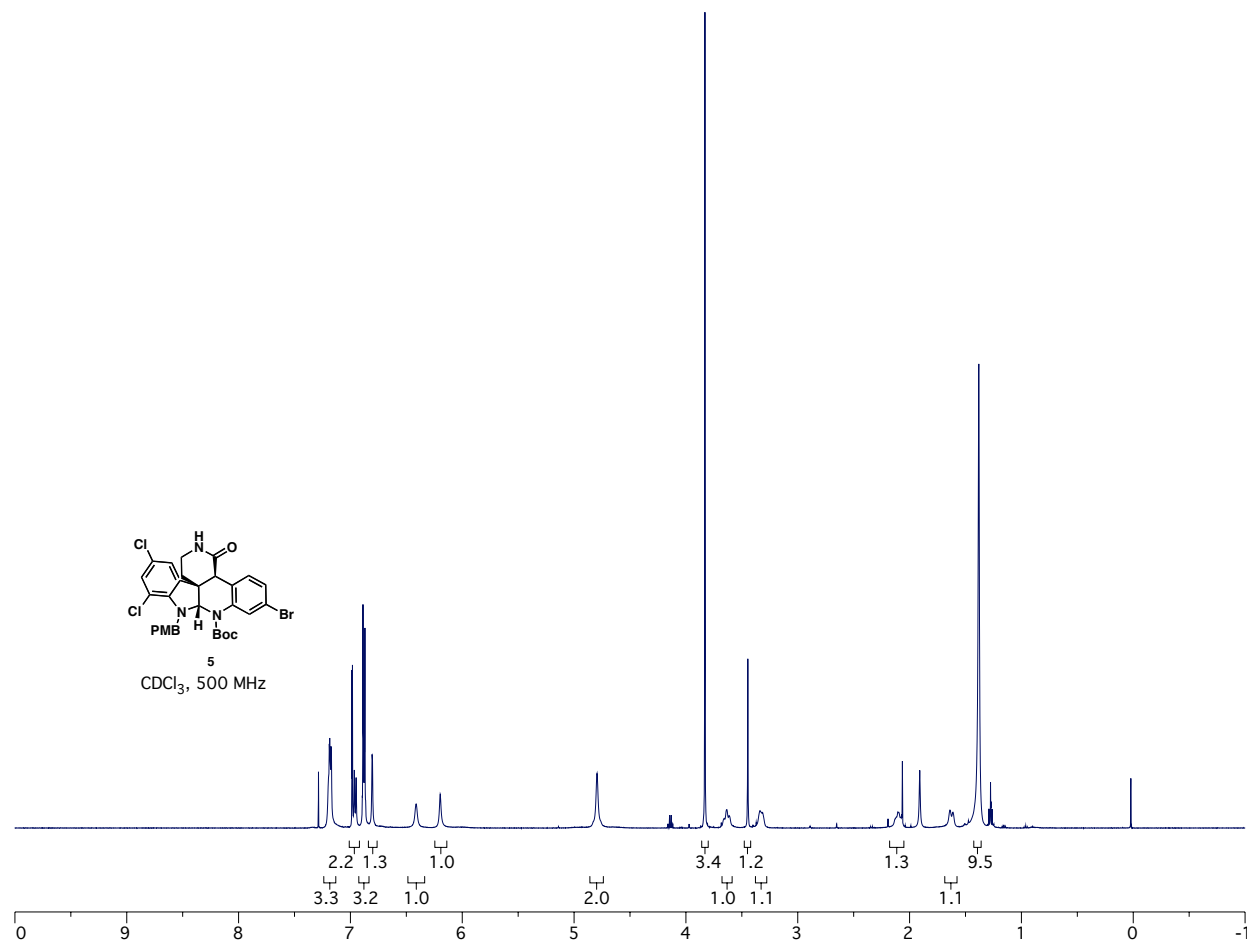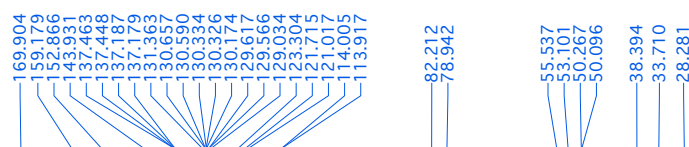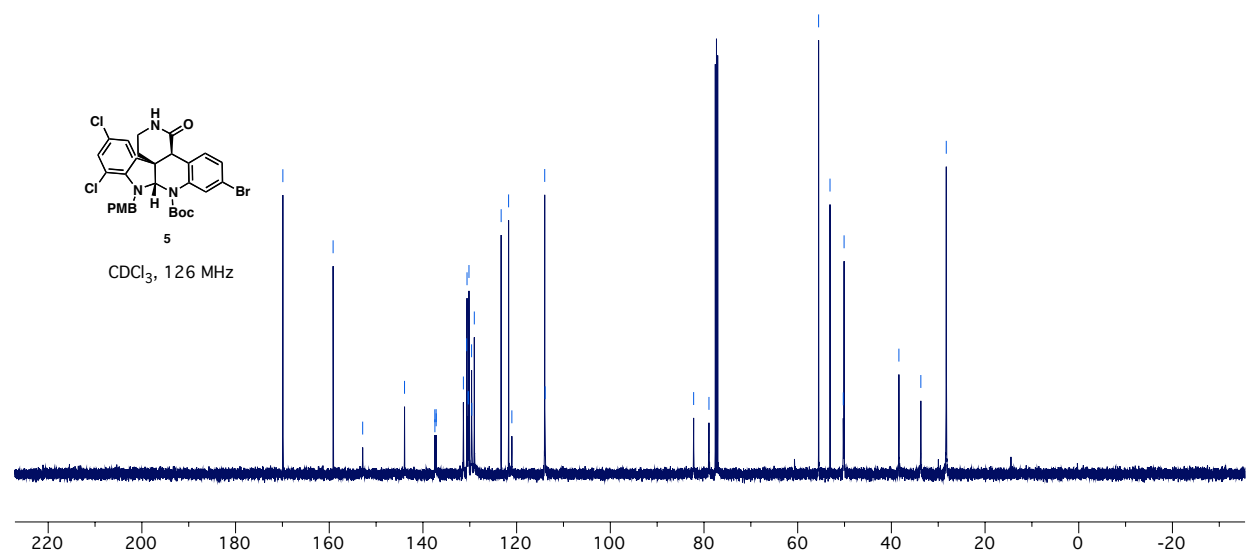

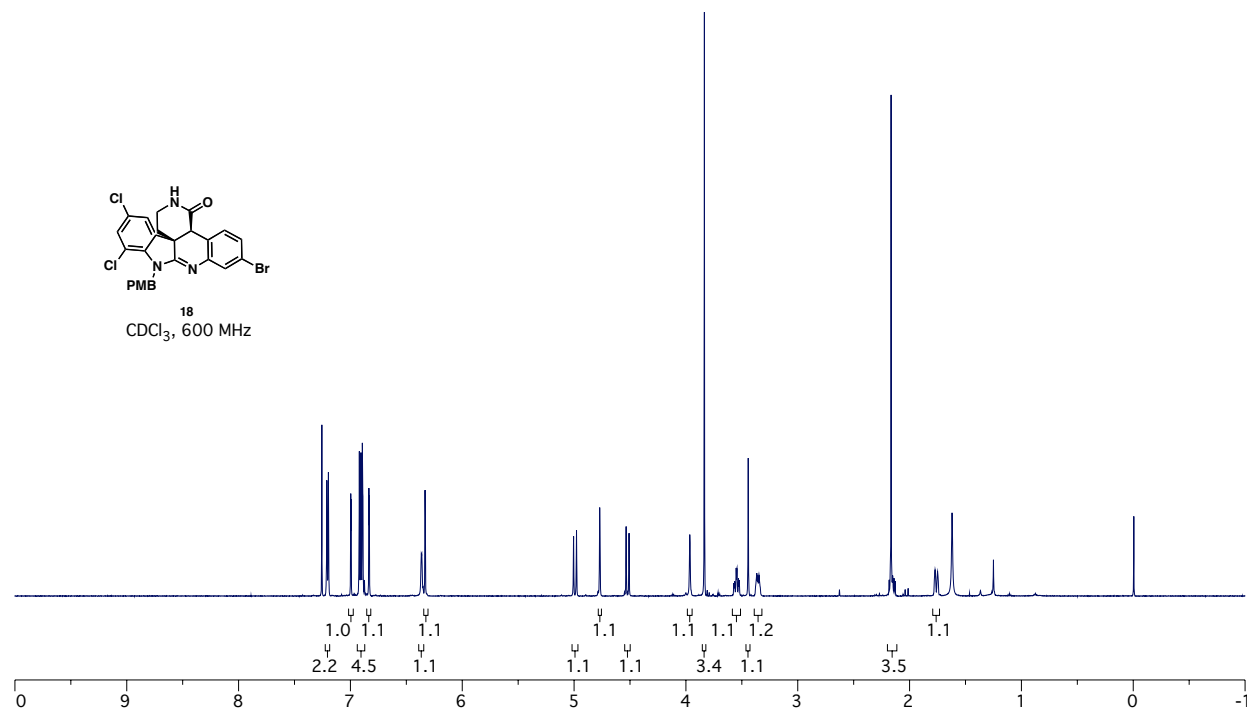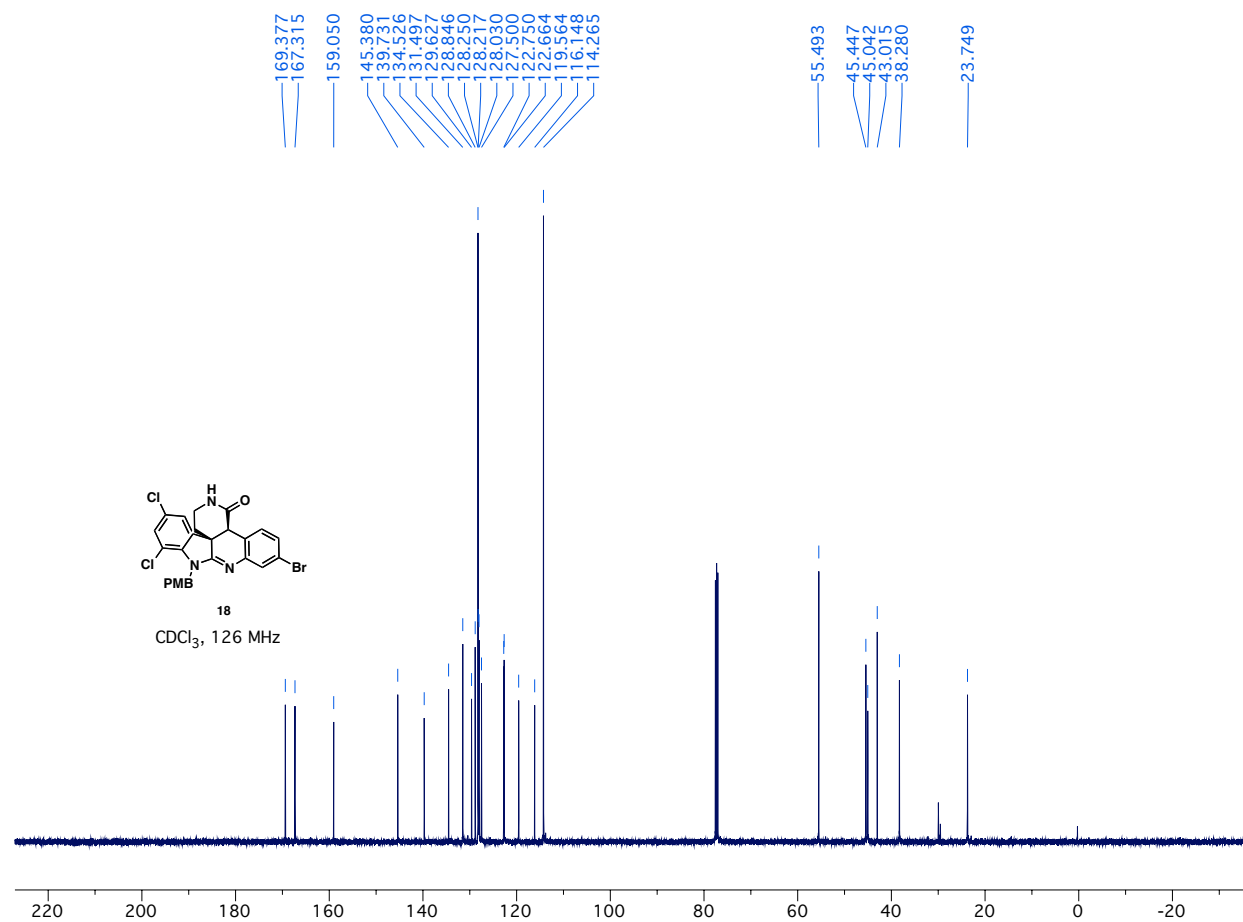

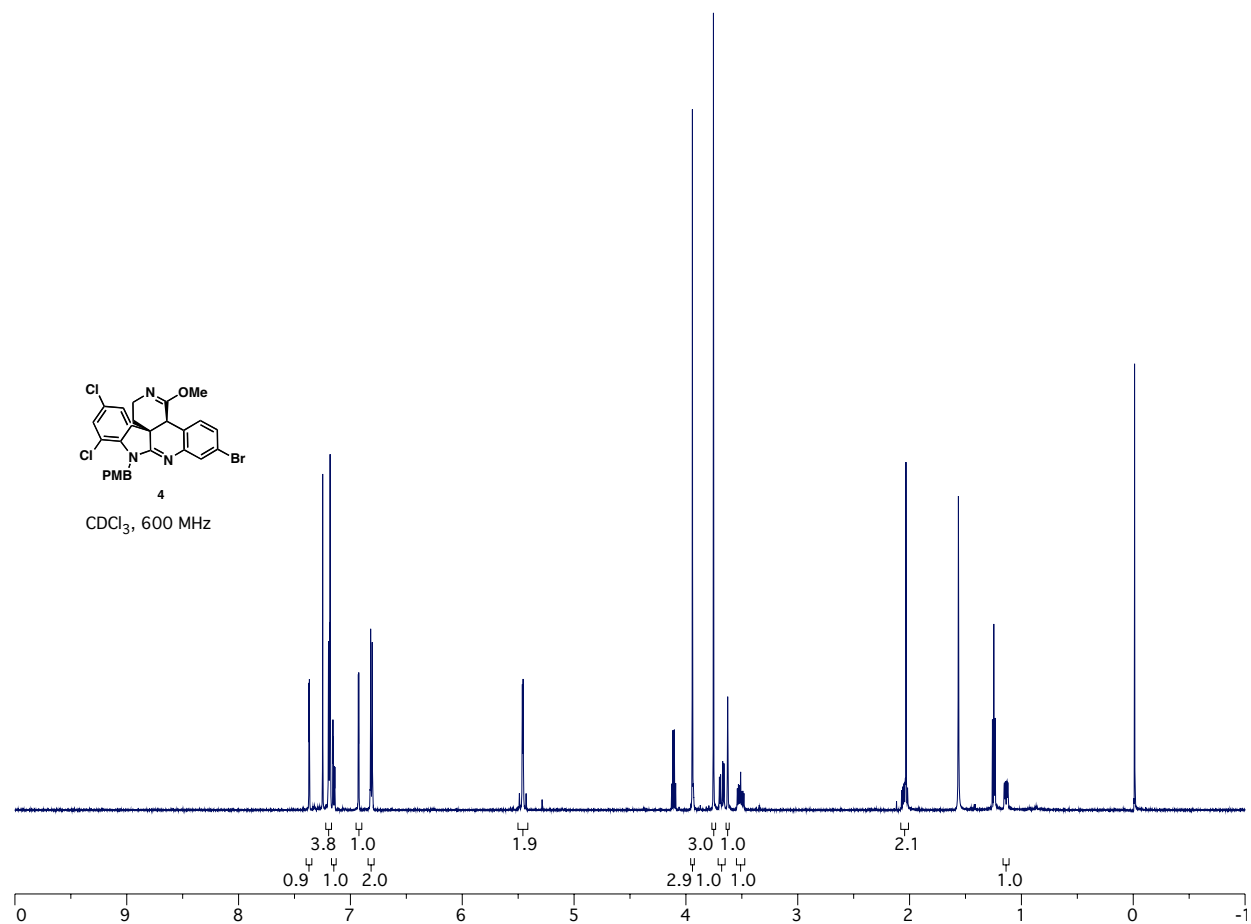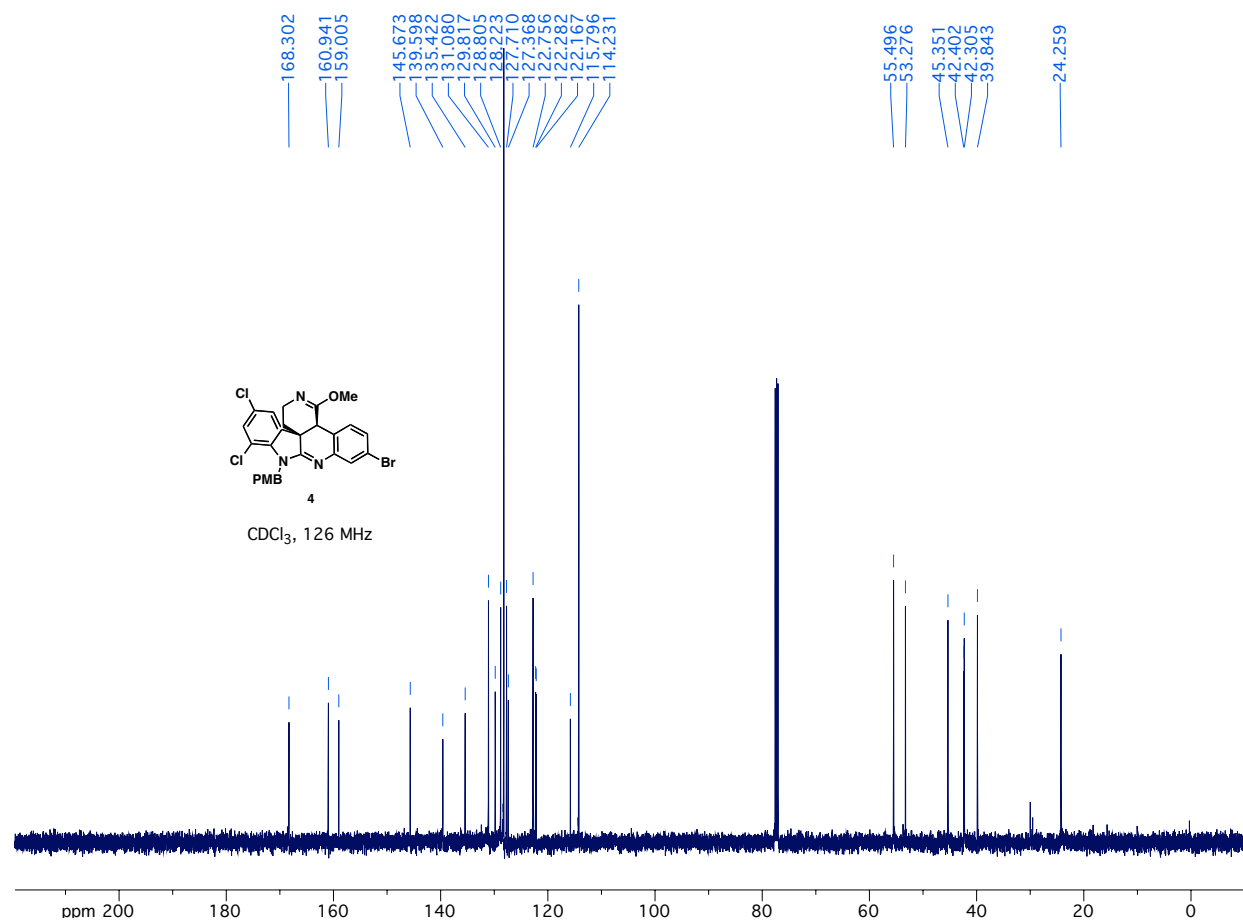

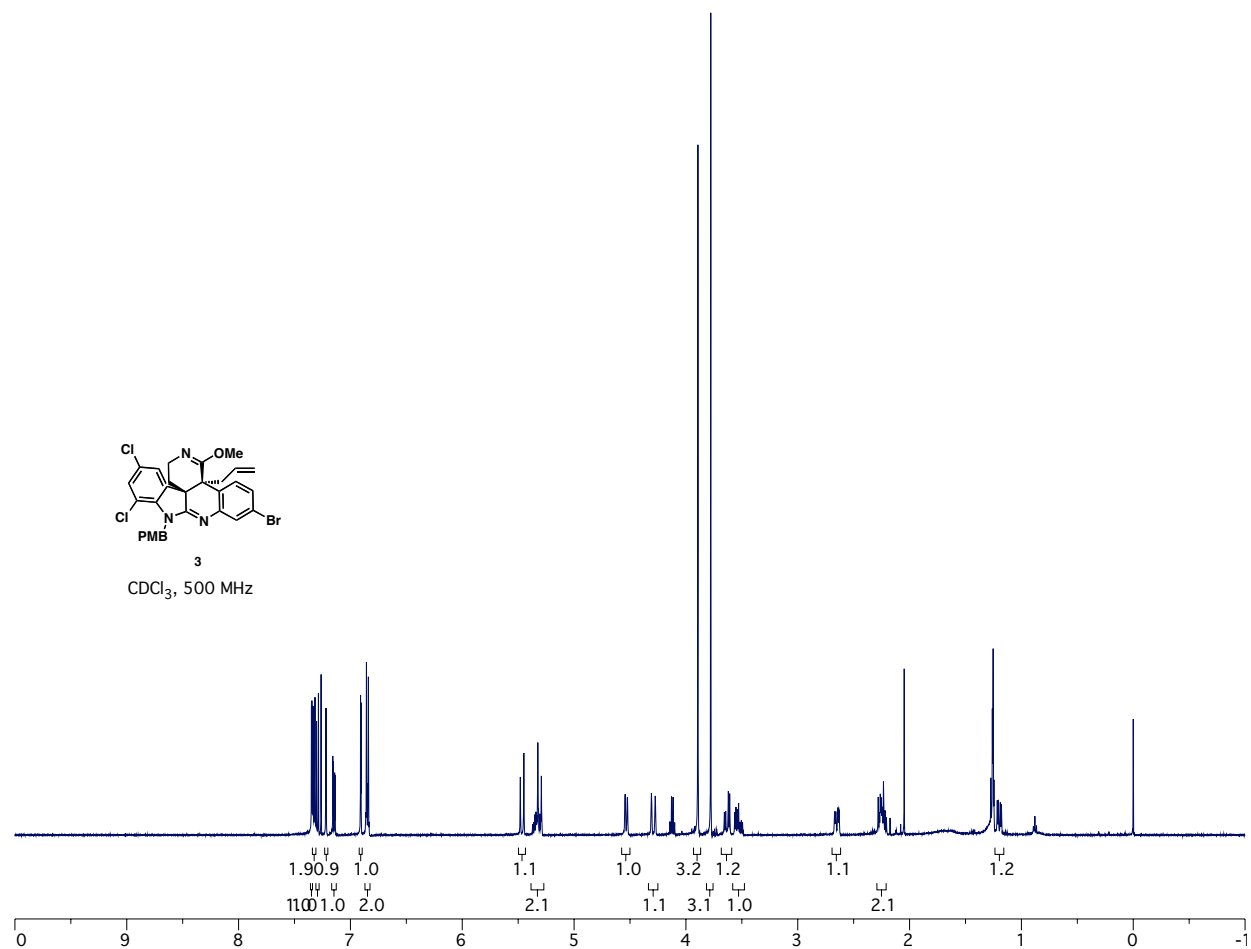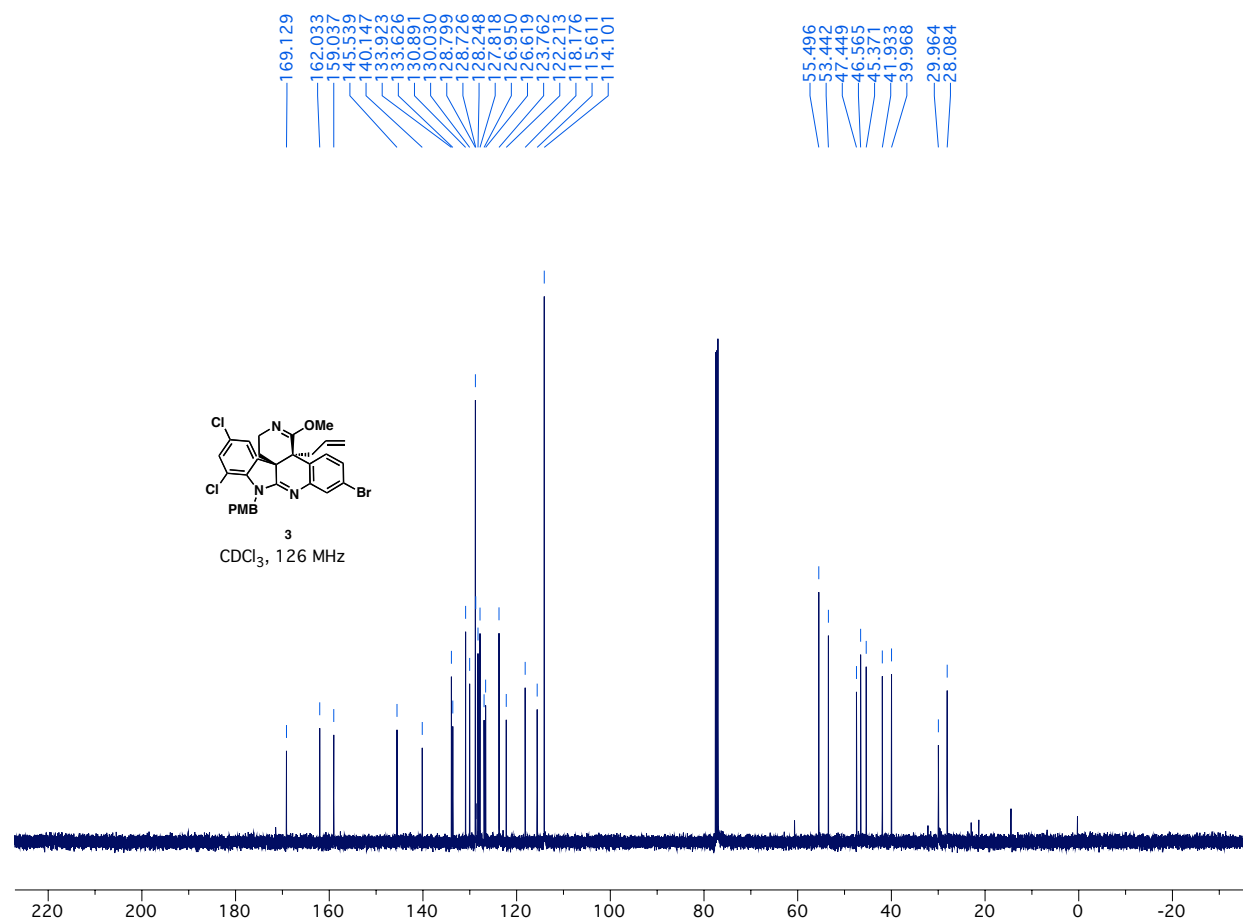

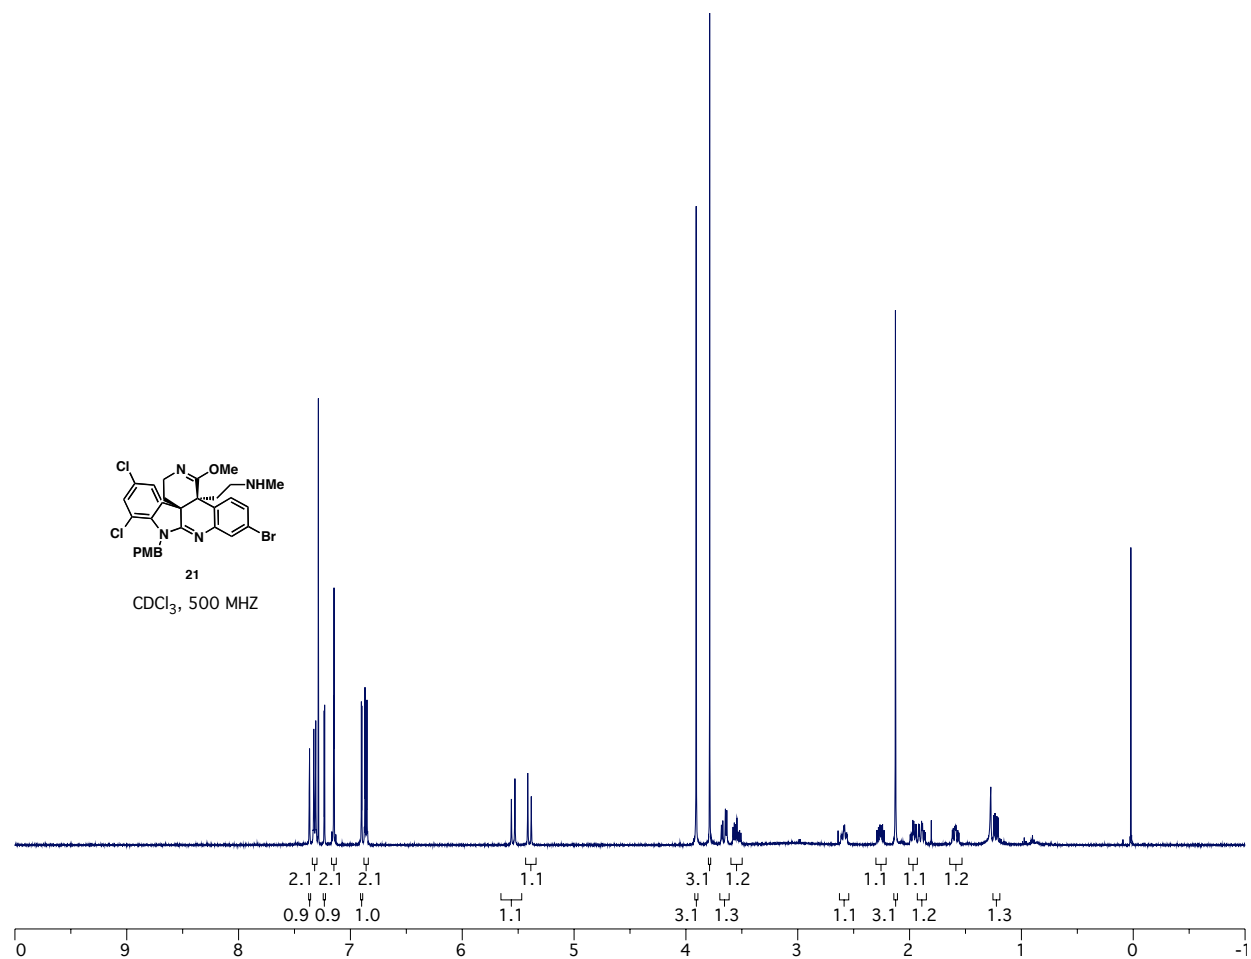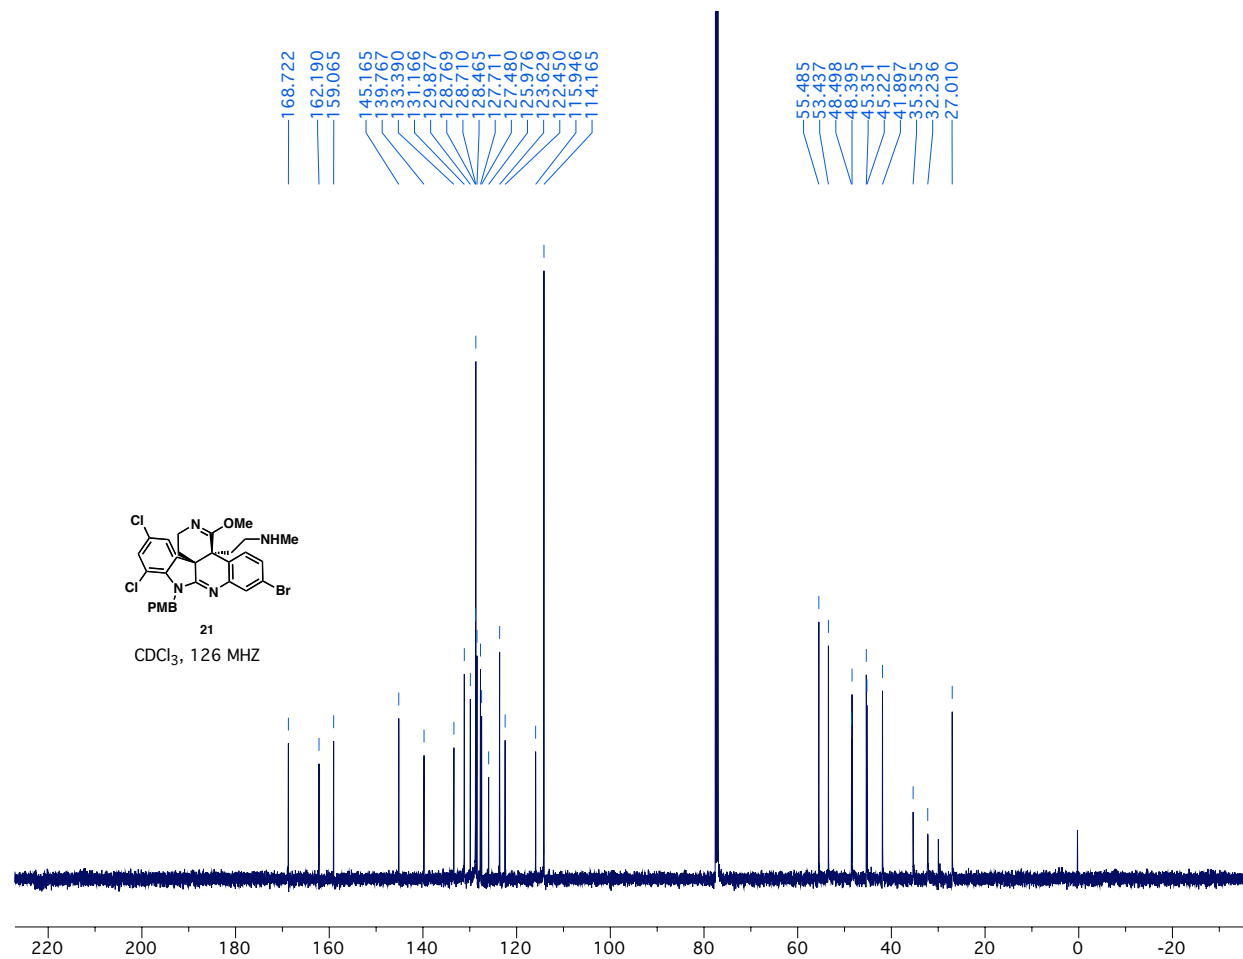



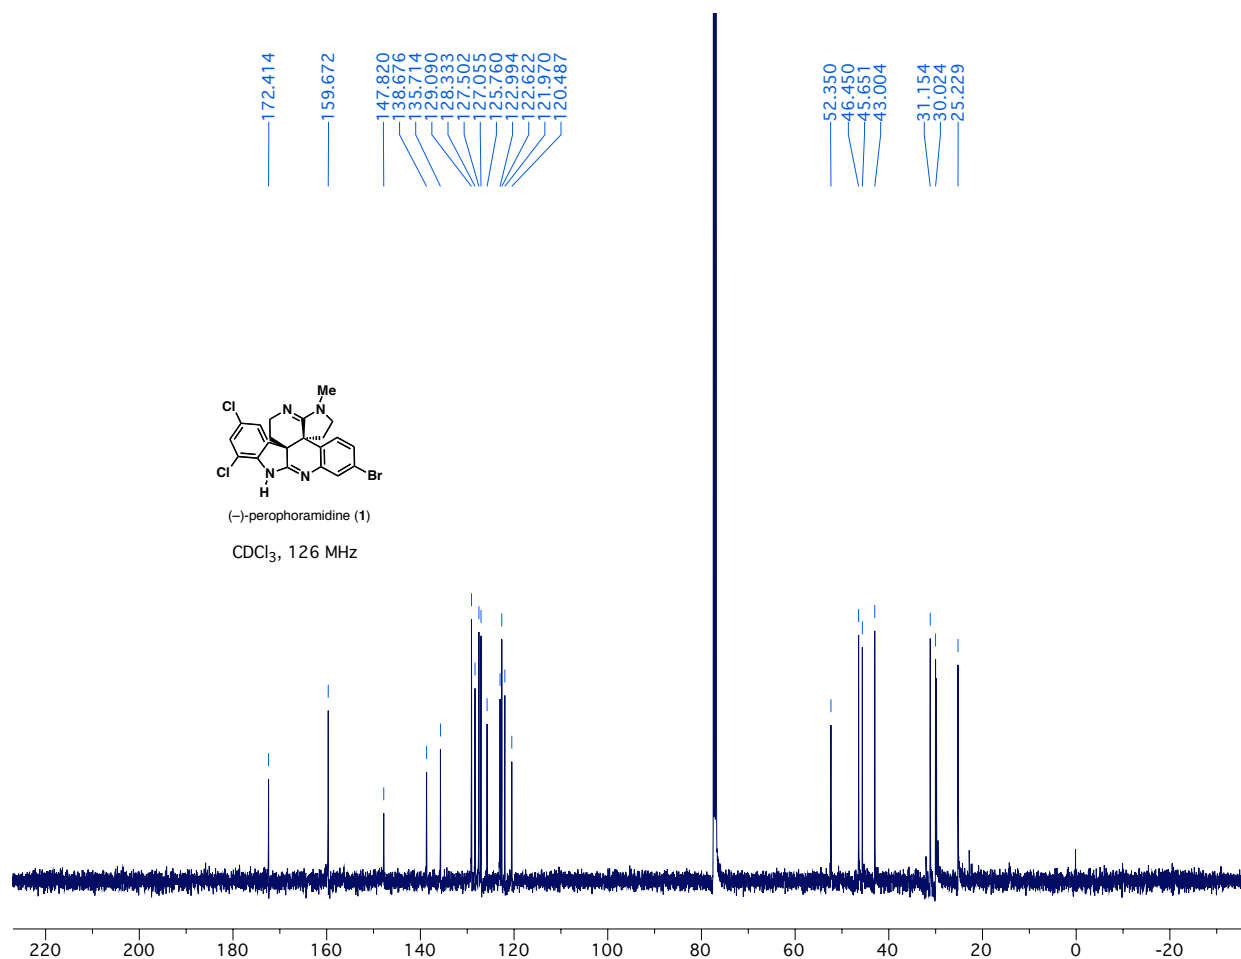

Supplement: SC-006-C4SC01826E-s001.pdf [file SC-006-C4SC01826E-s001.pdf]
